# Supplementary material for: Experimental and theoretical investigations on three DyIII4 single molecule magnets: structural and magneto-structural correlations
Source: Royal Society of Chemistry journal article supplement (doi:10.1039/d2dt02348b), 2022-01-01
Supplement: d2dt02348b1.pdf [file d2dt02348b1.pdf]

**Electronic Supplementary Information (ESI)  
for**

**Experimental and theoretical investigation on three Dy<sup>III</sup><sub>4</sub> single  
molecule magnets: structural and magneto-structural correlations**

**Shuvankar Mandal,<sup>a</sup> Abhishek Pramanik,<sup>a</sup> Sourav Dey,<sup>b</sup> Luca M. Carrella,<sup>c</sup>  
Gopalan Rajaraman,<sup>b\*</sup> Eva Rentschler<sup>c\*</sup> and Sasankasekhar Mohanta<sup>a\*</sup>**

<sup>a</sup>*Department of Chemistry, University of Calcutta, 92 A. P. C. Road, Kolkata 700  
009, India, E-mail: sm\_cu\_chem@yahoo.co.in.*

<sup>b</sup>*Department of Chemistry, Indian Institute of Technology Bombay, Powai,  
Mumbai 400076, India. Email: rajaraman@chem.iitb.ac.in.*

<sup>c</sup>*Department of Chemistry, Johannes-Gutenberg University Mainz, Duesbergweg  
10-14, D-55128 Mainz, Germany. E-mail: rentschl@uni-mainz.de*

**Table S1.** Selected bond angles (°) in the coordination environment in **1–3**.

|                   | <b>1</b>   | <b>2</b>   | <b>3</b>   |                | <b>1</b>   | <b>2</b>   | <b>3</b>   |
|-------------------|------------|------------|------------|----------------|------------|------------|------------|
| O1–Dy1–N1         | 73.7(2)    | 73.07(19)  | 73.81(14)  | N2–Dy2–O2      | 134.6(2)   | 135.41(17) | 135.84(13) |
| O1–Dy1–O5/O5A     | 91.4(2)    | 90.72(17)  | 90.55(14)  | N2–Dy2–O5      | 67.1(2)    | 68.03(17)  | 68.14(14)  |
| O1–Dy1–O2/O2A     | 117.7(2)   | 115.07(18) | 116.06(13) | N2–Dy2–O10     | 74.5(3)    | 78.2(2)    | 78.19(15)  |
| O1–Dy1–O7         | 151.4(2)   | 153.20(18) | 152.20(13) | N2–Dy2–O9      | 124.3(3)   | 125.09(19) | 124.02(14) |
| O1–Dy1–O4         | 136.1(2)   | 136.05(17) | 136.25(14) | N2–Dy2–O4A/O4  | 73.3(2)    | 73.27(17)  | 73.27(13)  |
| O1–Dy1–O6         | 76.4(2)    | 77.65(18)  | 76.25(14)  | N2–Dy2–O7A     | 132.8(2)   | 81.98(17)  | 130.09(12) |
| O1–Dy1–O8         | 83.7(2)    | 84.5(2)    | 84.79(14)  | N2–Dy2–O7      | 85.3(2)    | 129.88(16) | 83.46(13)  |
| O2/O2A–Dy1–O5/O5A | 66.81(19)  | 67.29(15)  | 67.16(12)  | O2–Dy2–O5      | 67.58(19)  | 67.91(15)  | 68.06(12)  |
| O2/O2A–Dy1–O7     | 75.68(18)  | 75.34(14)  | 75.04(11)  | O2–Dy2–O10     | 105.0(2)   | 106.45(19) | 104.93(15) |
| O2/O2A–Dy1–O4     | 80.73(19)  | 81.10(15)  | 81.93(12)  | O2–Dy2–O9      | 88.1(2)    | 87.33(17)  | 87.08(13)  |
| O2/O2A–Dy1–O6     | 131.5(2)   | 130.24(16) | 129.43(12) | O2–Dy2–O4A/O4  | 149.18(19) | 147.75(15) | 147.86(12) |
| O2/O2A–Dy1–O8     | 145.2(2)   | 150.32(19) | 149.87(13) | O2–Dy2–O7A     | 79.08(19)  | 77.35(14)  | 78.45(12)  |
| O2/O2A–Dy1–N1     | 66.5(2)    | 65.94(16)  | 65.29(13)  | O2–Dy2–O7      | 77.75(19)  | 78.24(15)  | 76.67(12)  |
| O4–Dy1–O5/O5A     | 131.80(18) | 132.23(14) | 132.57(12) | O4A/O4–Dy2–O5  | 138.65(19) | 140.43(16) | 140.50(12) |
| O4–Dy1–O7         | 67.97(18)  | 67.89(14)  | 68.04(12)  | O4A/O4–Dy2–O10 | 94.5(2)    | 92.3(2)    | 93.17(15)  |
| O4–Dy1–O6         | 63.40(19)  | 62.60(15)  | 62.89(12)  | O4A/O4–Dy2–O9  | 82.0(2)    | 82.98(18)  | 82.92(13)  |
| O4–Dy1–O8         | 103.1(2)   | 100.5(2)   | 98.04(13)  | O4A/O4–Dy2–O7A | 70.42(19)  | 96.79(15)  | 70.15(12)  |
| O4–Dy1–N1         | 79.8(2)    | 78.32(17)  | 79.86(13)  | O4A/O4–Dy2–O7  | 95.05(19)  | 70.08(15)  | 98.04(12)  |
| O5/O5A–Dy1–O7     | 70.04(18)  | 69.97(14)  | 69.70(12)  | O5–Dy2–O10     | 86.1(2)    | 87.73(19)  | 87.10(14)  |
| O5/O5A–Dy1–O6     | 161.2(2)   | 161.87(16) | 162.14(12) | O5–Dy2–O9      | 130.5(2)   | 126.44(18) | 126.04(13) |
| O5/O5A–Dy1–O8     | 86.9(2)    | 91.7(2)    | 92.60(13)  | O5–Dy2–O7A     | 132.08(18) | 70.34(15)  | 131.95(12) |
| O5/O5A–Dy1–N1     | 115.1(2)   | 116.30(17) | 114.96(13) | O5–Dy2–O7      | 70.86(18)  | 132.08(15) | 69.90(12)  |
| O6–Dy1–O7         | 114.96(19) | 115.64(15) | 117.78(13) | O7–Dy2–O7A     | 69.1(2)    | 69.89(18)  | 69.56(13)  |
| O6–Dy1–O8         | 77.7(2)    | 73.6(2)    | 74.50(14)  | O7–Dy2–O9      | 147.1(3)   | 82.83(17)  | 150.84(13) |
| O6–Dy1–N1         | 75.5(2)    | 73.88(18)  | 73.27(13)  | O7–Dy2–O10     | 154.0(2)   | 135.27(19) | 154.73(14) |
| O7–Dy1–O8         | 74.0(2)    | 77.89(19)  | 77.07(13)  | O7A–Dy2–O9     | 79.2(3)    | 150.81(17) | 83.68(12)  |
| O7–Dy1–N1         | 133.5(2)   | 131.71(17) | 131.74(13) | O7A–Dy2–O10    | 136.8(2)   | 154.77(19) | 135.70(13) |
| O8–Dy1–N1         | 148.2(2)   | 143.7(2)   | 144.64(15) | O9–Dy2–O10     | 58.4(3)    | 53.69(19)  | 53.00(14)  |

**Table S2.** The CASSCF/RASSI-SO/SINGLE\_ANISO computed energy and g tensors of the eight KDs ( ${}^6\text{H}_{15/2}$ ) of the **Dy2A (Fig. S8; Dy<sub>b</sub>) centre of complex 1.**

| Energy (cm <sup>-1</sup> ) | $g_x$ | $g_y$ | $g_z$  | Angle of $g_{zz}$ between ground and first excited KD (°) |
|----------------------------|-------|-------|--------|-----------------------------------------------------------|
| 0.0                        | 0.121 | 0.367 | 18.970 |                                                           |
| 54.9                       | 0.744 | 0.955 | 15.143 | 12.2                                                      |
| 124.2                      | 3.147 | 3.653 | 10.822 |                                                           |
| 185.3                      | 7.392 | 6.537 | 1.306  |                                                           |
| 255.8                      | 2.463 | 4.048 | 12.773 |                                                           |
| 336.9                      | 0.657 | 1.036 | 16.435 |                                                           |
| 402.6                      | 0.233 | 0.270 | 19.519 |                                                           |
| 486.2                      | 0.035 | 0.068 | 19.441 |                                                           |

**Table S3.** The CASSCF/RASSI-SO/SINGLE\_ANISO computed energy and g tensors of the eight KDs ( ${}^6\text{H}_{15/2}$ ) of the **Dy1 (Fig. S8; Dy<sub>w</sub>) centre of complex 1.**

| Energy (cm <sup>-1</sup> ) | $g_x$ | $g_y$ | $g_z$  | Angle of $g_{zz}$ between ground and first excited KD (°) |
|----------------------------|-------|-------|--------|-----------------------------------------------------------|
| 0.0                        | 0.013 | 0.024 | 19.828 |                                                           |
| 164.0                      | 0.143 | 0.252 | 19.068 | 15.6                                                      |
| 281.6                      | 3.341 | 4.541 | 10.963 |                                                           |
| 341.1                      | 0.202 | 4.396 | 10.987 |                                                           |
| 398.2                      | 3.251 | 5.661 | 9.413  |                                                           |
| 481.8                      | 1.016 | 3.513 | 13.294 |                                                           |
| 518.1                      | 0.559 | 2.831 | 13.320 |                                                           |
| 551.7                      | 1.450 | 3.085 | 16.573 |                                                           |

**Table S4.** The CASSCF/RASSI-SO/SINGLE\_ANISO computed energy and g tensors of the eight KDs ( ${}^6\text{H}_{15/2}$ ) of the **Dy2 (Fig. S8; Dy<sub>b</sub>) centre of complex 1.**

| Energy (cm <sup>-1</sup> ) | $g_x$ | $g_y$ | $g_z$  | Angle of $g_{zz}$ between ground and first excited KD (°) |
|----------------------------|-------|-------|--------|-----------------------------------------------------------|
| 0.0                        | 0.121 | 0.365 | 18.968 |                                                           |
| 54.9                       | 0.746 | 0.956 | 15.130 | 12.0                                                      |
| 124.2                      | 3.142 | 3.641 | 10.814 |                                                           |
| 185.3                      | 7.400 | 6.509 | 1.289  |                                                           |
| 255.8                      | 2.450 | 4.050 | 12.734 |                                                           |
| 336.9                      | 0.656 | 1.038 | 16.408 |                                                           |
| 402.6                      | 0.232 | 0.272 | 19.464 |                                                           |
| 486.2                      | 0.035 | 0.068 | 19.428 |                                                           |

**Table S5.** The CASSCF/RASSI-SO/SINGLE\_ANISO computed energy and  $g$  tensors of the eight KDs ( ${}^6\text{H}_{15/2}$ ) of the **Dy1A (Fig. S8;  $\text{Dy}_w$ )** centre of complex 1.

| Energy ( $\text{cm}^{-1}$ ) | $g_x$ | $g_y$ | $g_z$  | Angle of $g_{zz}$ between ground and first excited KD ( $^\circ$ ) |
|-----------------------------|-------|-------|--------|--------------------------------------------------------------------|
| 0.0                         | 0.013 | 0.024 | 19.840 |                                                                    |
| 164.0                       | 0.143 | 0.253 | 17.091 | 15.7                                                               |
| 281.6                       | 3.353 | 4.556 | 10.969 |                                                                    |
| 341.1                       | 0.197 | 4.400 | 11.019 |                                                                    |
| 398.2                       | 3.256 | 5.674 | 9.456  |                                                                    |
| 481.8                       | 1.014 | 3.526 | 13.356 |                                                                    |
| 518.1                       | 0.561 | 2.837 | 13.332 |                                                                    |
| 551.7                       | 1.453 | 3.080 | 16.632 |                                                                    |

**Table S6.** The CASSCF/RASSI-SO/SINGLE\_ANISO computed energy and  $g$  tensors of the eight KDs ( ${}^6\text{H}_{15/2}$ ) of the **Dy2 (Fig. S8;  $\text{Dy}_b$ )** centre of complex 2.

| Energy ( $\text{cm}^{-1}$ ) | $g_x$ | $g_y$ | $g_z$  | Angle of $g_{zz}$ between ground and first excited KD ( $^\circ$ ) |
|-----------------------------|-------|-------|--------|--------------------------------------------------------------------|
| 0.0                         | 0.080 | 0.181 | 18.831 |                                                                    |
| 91.5                        | 2.144 | 4.835 | 12.199 | 7.3                                                                |
| 129.8                       | 0.258 | 5.390 | 10.791 |                                                                    |
| 188.2                       | 9.185 | 6.399 | 1.785  |                                                                    |
| 257.6                       | 1.930 | 3.442 | 12.763 |                                                                    |
| 355.1                       | 0.162 | 1.270 | 15.421 |                                                                    |
| 371.1                       | 0.574 | 1.147 | 18.517 |                                                                    |
| 440.6                       | 0.020 | 0.043 | 19.149 |                                                                    |

**Table S7.** The CASSCF/RASSI-SO/SINGLE\_ANISO computed energy and  $g$  tensors of the eight KDs ( ${}^6\text{H}_{15/2}$ ) of the **Dy1 (Fig. S8;  $\text{Dy}_w$ )** centre of complex 2.

| Energy ( $\text{cm}^{-1}$ ) | $g_x$ | $g_y$ | $g_z$  | Angle of $g_{zz}$ between ground and first excited KD ( $^\circ$ ) |
|-----------------------------|-------|-------|--------|--------------------------------------------------------------------|
| 0.0                         | 0.009 | 0.020 | 19.803 |                                                                    |
| 169.5                       | 0.052 | 0.162 | 17.187 | 19.0                                                               |
| 276.6                       | 4.605 | 5.627 | 10.183 |                                                                    |
| 323.6                       | 0.776 | 3.393 | 13.075 |                                                                    |
| 383.1                       | 1.316 | 4.872 | 8.466  |                                                                    |
| 456.2                       | 0.784 | 4.722 | 13.829 |                                                                    |
| 508.3                       | 0.488 | 2.765 | 13.916 |                                                                    |
| 547.6                       | 1.169 | 3.192 | 15.981 |                                                                    |

**Table S8.** The CASSCF/RASSI-SO/SINGLE\_ANISO computed energy and  $g$  tensors of the eight KDs ( ${}^6\text{H}_{15/2}$ ) of the **Dy2A (Fig. S8;  $\text{Dy}_b$ ) centre of complex 2.**

| Energy ( $\text{cm}^{-1}$ ) | $g_x$ | $g_y$ | $g_z$  | Angle of $g_{zz}$ between ground and first excited KD ( $^\circ$ ) |
|-----------------------------|-------|-------|--------|--------------------------------------------------------------------|
| 0.0                         | 0.080 | 0.183 | 18.880 |                                                                    |
| 91.5                        | 2.147 | 4.861 | 12.216 | 7.3                                                                |
| 129.8                       | 0.261 | 5.394 | 10.847 |                                                                    |
| 188.2                       | 9.193 | 6.415 | 1.779  |                                                                    |
| 257.6                       | 1.927 | 3.451 | 12.758 |                                                                    |
| 335.0                       | 0.157 | 1.275 | 15.421 |                                                                    |
| 371.1                       | 0.578 | 1.148 | 18.521 |                                                                    |
| 440.6                       | 0.020 | 0.043 | 19.169 |                                                                    |

**Table S9.** The CASSCF/RASSI-SO/SINGLE\_ANISO computed energy and  $g$  tensors of the eight KDs ( ${}^6\text{H}_{15/2}$ ) of the **Dy1A (Fig. S8;  $\text{Dy}_w$ ) centre of complex 2.**

| Energy ( $\text{cm}^{-1}$ ) | $g_x$ | $g_y$ | $g_z$  | Angle of $g_{zz}$ between ground and first excited KD ( $^\circ$ ) |
|-----------------------------|-------|-------|--------|--------------------------------------------------------------------|
| 0.0                         | 0.009 | 0.020 | 19.907 |                                                                    |
| 169.5                       | 0.053 | 0.161 | 17.266 | 18.9                                                               |
| 276.6                       | 4.616 | 5.634 | 10.202 |                                                                    |
| 323.6                       | 0.799 | 3.407 | 13.056 |                                                                    |
| 383.1                       | 1.314 | 4.873 | 8.481  |                                                                    |
| 456.2                       | 0.785 | 4.733 | 13.883 |                                                                    |
| 508.3                       | 0.492 | 2.771 | 13.917 |                                                                    |
| 547.6                       | 1.171 | 3.202 | 16.034 |                                                                    |

**Table S10.** The CASSCF/RASSI-SO/SINGLE\_ANISO computed energy and  $g$  tensors of the eight KDs ( ${}^6\text{H}_{15/2}$ ) of the **Dy2A (Fig. S8;  $\text{Dy}_b$ ) centre of complex 3.**

| Energy ( $\text{cm}^{-1}$ ) | $g_x$ | $g_y$ | $g_z$  | Angle of $g_{zz}$ between ground and first excited KD ( $^\circ$ ) |
|-----------------------------|-------|-------|--------|--------------------------------------------------------------------|
| 0.0                         | 0.209 | 0.501 | 18.423 |                                                                    |
| 56.1                        | 2.307 | 3.763 | 14.088 | 45.2                                                               |
| 95.0                        | 7.837 | 5.655 | 1.021  |                                                                    |
| 158.8                       | 8.750 | 5.605 | 1.397  |                                                                    |
| 239.3                       | 1.390 | 3.181 | 12.505 |                                                                    |
| 321.8                       | 0.110 | 1.555 | 16.020 |                                                                    |
| 359.6                       | 0.642 | 1.645 | 16.373 |                                                                    |
| 473.9                       | 0.012 | 0.017 | 19.311 |                                                                    |

**Table S11.** The CASSCF/RASSI-SO/SINGLE\_ANISO computed energy and  $g$  tensors of the eight KDs ( ${}^6\text{H}_{15/2}$ ) of the **Dy1 (Fig. S8;  $\text{Dy}_w$ ) centre of complex 3.**

| Energy (cm <sup>-1</sup> ) | $g_x$ | $g_y$ | $g_z$  | Angle of $g_{zz}$ between ground and first excited KD (°) |
|----------------------------|-------|-------|--------|-----------------------------------------------------------|
| 0.0                        | 0.009 | 0.018 | 19.844 |                                                           |
| 169.6                      | 0.115 | 0.181 | 17.261 | 17.7                                                      |
| 296.2                      | 3.285 | 4.915 | 10.663 |                                                           |
| 351.1                      | 0.812 | 4.391 | 12.349 |                                                           |
| 420.3                      | 2.067 | 5.038 | 9.484  |                                                           |
| 485.6                      | 1.401 | 5.353 | 11.204 |                                                           |
| 522.5                      | 0.938 | 4.918 | 11.866 |                                                           |
| 626.7                      | 0.373 | 0.509 | 19.156 |                                                           |

**Table S12.** The CASSCF/RASSI-SO/SINGLE\_ANISO computed energy and  $g$  tensors of the eight KDs ( ${}^6\text{H}_{15/2}$ ) of the **Dy2 (Fig. S8; Dy<sub>b</sub>)** centre of complex **3**.

| Energy (cm <sup>-1</sup> ) | $g_x$ | $g_y$ | $g_z$  | Angle of $g_{zz}$ between ground and first excited KD (°) |
|----------------------------|-------|-------|--------|-----------------------------------------------------------|
| 0.0                        | 0.207 | 0.499 | 18.402 |                                                           |
| 56.1                       | 2.301 | 3.751 | 14.037 | 45.2                                                      |
| 94.9                       | 7.811 | 5.655 | 1.043  |                                                           |
| 158.8                      | 8.756 | 5.590 | 1.409  |                                                           |
| 239.3                      | 1.309 | 3.174 | 12.521 |                                                           |
| 321.8                      | 0.109 | 1.554 | 16.047 |                                                           |
| 359.6                      | 0.640 | 1.639 | 16.373 |                                                           |
| 473.9                      | 0.012 | 0.017 | 19.286 |                                                           |

**Table S13.** The CASSCF/RASSI-SO/SINGLE\_ANISO computed energy and  $g$  tensors of the eight KDs ( ${}^6\text{H}_{15/2}$ ) of the **Dy1A (Fig. S8; Dy<sub>w</sub>)** centre of complex **3**.

| Energy (cm <sup>-1</sup> ) | $g_x$ | $g_y$ | $g_z$  | Angle of $g_{zz}$ between ground and first excited KD (°) |
|----------------------------|-------|-------|--------|-----------------------------------------------------------|
| 0.0                        | 0.009 | 0.018 | 19.929 |                                                           |
| 169.6                      | 0.117 | 0.181 | 17.311 | 17.6                                                      |
| 296.2                      | 3.299 | 4.914 | 10.671 |                                                           |
| 351.1                      | 0.791 | 4.401 | 12.328 |                                                           |
| 420.3                      | 2.065 | 5.035 | 9.502  |                                                           |
| 485.6                      | 1.410 | 5.365 | 11.203 |                                                           |
| 522.5                      | 0.939 | 4.920 | 11.901 |                                                           |
| 626.7                      | 0.373 | 0.511 | 19.199 |                                                           |

**Table S14.** The computed crystal field parameter of each metal centres in complex **1**.

| k                                                  | q  | $B_k^q$                          |                                 |                                 |                                  |
|----------------------------------------------------|----|----------------------------------|---------------------------------|---------------------------------|----------------------------------|
|                                                    |    | Dy2A (Fig. S8; Dy <sub>b</sub> ) | Dy1 (Fig. S8; Dy <sub>w</sub> ) | Dy2 (Fig. S8; Dy <sub>b</sub> ) | Dy1A (Fig. S8; Dy <sub>w</sub> ) |
| 2                                                  | -2 | -7.21E-01                        | 5.72E-01                        | -7.21E-01                       | 5.67E-01                         |
|                                                    | -1 | 7.57E-01                         | -1.08E-04                       | 7.58E-01                        | 6.66E-02                         |
|                                                    | 0  | -1.96E+00                        | -2.41E+00                       | -1.96E+00                       | -2.41E+00                        |
|                                                    | 1  | 1.37E-01                         | 2.14E+00                        | 1.11E-01                        | 2.13E+00                         |
|                                                    | 2  | 1.96E+00                         | 4.10E-01                        | 1.96E+00                        | 4.15E-01                         |
| $\left/ \frac{Av. axial}{Av. non - axial} \right/$ |    | 2.19E+00                         | 3.09E+00                        | 2.21E+00                        | 3.03E+00                         |
| 4                                                  | -4 | -1.54E-02                        | -8.23E-03                       | -1.53E-02                       | -8.05E-03                        |
|                                                    | -3 | 6.52E-02                         | -2.80E-02                       | 6.55E-02                        | -2.76E-02                        |
|                                                    | -2 | -8.21E-03                        | -1.41E-02                       | -8.31E-03                       | -1.40E-02                        |
|                                                    | -1 | 3.03E-03                         | -4.34E-03                       | 3.22E-03                        | -3.64E-03                        |
|                                                    | 0  | -7.81E-04                        | -5.58E-03                       | -8.02E-04                       | -5.60E-03                        |
|                                                    | 1  | -4.48E-03                        | 8.80E-03                        | -4.56E-03                       | 8.48E-03                         |
|                                                    | 2  | 7.97E-03                         | -3.27E-03                       | 7.71E-03                        | -3.23E-03                        |
|                                                    | 3  | -1.54E-02                        | -6.07E-02                       | -1.50E-02                       | -6.15E-02                        |
| 6                                                  | -6 | 7.03E-05                         | 3.99E-05                        | 6.89E-05                        | 4.15E-05                         |
|                                                    | -5 | -2.66E-04                        | 2.45E-05                        | -2.65E-04                       | 3.04E-05                         |
|                                                    | -4 | 3.55E-05                         | 1.21E-05                        | 3.74E-05                        | 1.55E-05                         |
|                                                    | -3 | 5.40E-05                         | -3.03E-05                       | 5.85E-05                        | -2.94E-05                        |
|                                                    | -2 | 2.05E-04                         | -1.91E-06                       | 2.06E-04                        | 4.25E-06                         |
|                                                    | -1 | -3.12E-05                        | -1.19E-05                       | -3.35E-05                       | -1.53E-05                        |
|                                                    | 0  | 1.15E-05                         | 1.07E-05                        | 1.16E-05                        | 1.10E-05                         |
|                                                    | 1  | 7.62E-05                         | -3.54E-04                       | 7.62E-05                        | -3.53E-04                        |
|                                                    | 2  | 5.43E-05                         | 1.09E-04                        | 5.31E-05                        | 1.08E-04                         |
|                                                    | 3  | 1.75E-04                         | -1.17E-04                       | 1.75E-04                        | -1.15E-04                        |
|                                                    | 4  | 9.02E-05                         | -1.63E-04                       | 8.78E-05                        | -1.63E-04                        |
|                                                    | 5  | 5.81E-04                         | -8.92E-04                       | 5.82E-04                        | -8.93E-04                        |
|                                                    | 6  | -1.19E-04                        | 2.00E-04                        | -1.21E-04                       | 2.00E-04                         |

**Table S15.** The computed crystal field parameter of each metal centres in complex 2.

| k                                                  | q         | $B_k^q$                         |                                 |                                  |                                  |
|----------------------------------------------------|-----------|---------------------------------|---------------------------------|----------------------------------|----------------------------------|
|                                                    |           | Dy2 (Fig. S8; Dy <sub>b</sub> ) | Dy1 (Fig. S8; Dy <sub>w</sub> ) | Dy2A (Fig. S8; Dy <sub>b</sub> ) | Dy1A (Fig. S8; Dy <sub>w</sub> ) |
| 2                                                  | -2        | 9.61E-01                        | 3.95E-01                        | 9.85E-01                         | 3.92E-01                         |
|                                                    | -1        | -1.07E+00                       | 3.83E-01                        | -1.09E+00                        | 3.88E-01                         |
|                                                    | 0         | -1.09E+00                       | -2.30E+00                       | -1.09E+00                        | -2.29E+00                        |
|                                                    | 1         | 1.30E+00                        | -1.82E+00                       | 1.33E+00                         | -1.82E+00                        |
|                                                    | 2         | 2.35E+00                        | 7.75E-02                        | 2.34E+00                         | 8.37E-02                         |
| $\left/ \frac{Av. axial}{Av. non - axial} \right/$ |           | 7.67E-01                        | 5.32E+00                        | 7.59E-01                         | 5.29E+00                         |
| 4                                                  | -4        | -4.75E-03                       | 7.13E-03                        | -4.72E-03                        | 6.64E-03                         |
|                                                    | -3        | 8.43E-03                        | -3.00E-02                       | 9.55E-03                         | -2.91E-02                        |
|                                                    | -2        | 2.37E-02                        | -1.09E-02                       | 2.36E-02                         | -1.09E-02                        |
|                                                    | -1        | 1.77E-02                        | -2.79E-03                       | 1.73E-02                         | -2.66E-03                        |
|                                                    | 0         | -4.04E-03                       | -5.49E-03                       | -4.02E-03                        | -5.49E-03                        |
|                                                    | 1         | 5.96E-03                        | -9.39E-03                       | 6.09E-03                         | -9.56E-03                        |
|                                                    | 2         | 1.09E-02                        | -1.18E-02                       | 1.07E-02                         | -1.14E-02                        |
|                                                    | 3         | 3.82E-02                        | 6.57E-02                        | 3.85E-02                         | 6.69E-02                         |
|                                                    | 4         | -3.27E-03                       | -2.04E-02                       | -3.17E-03                        | -2.05E-02                        |
| 6                                                  | -6        | -1.26E-04                       | -2.32E-04                       | -1.24E-04                        | -2.31E-04                        |
|                                                    | -5        | 6.18E-04                        | -4.50E-04                       | 6.18E-04                         | -4.42E-04                        |
|                                                    | -4        | 1.11E-05                        | 1.57E-04                        | 9.90E-06                         | 1.55E-04                         |
|                                                    | -3        | 3.90E-04                        | 1.63E-05                        | 3.98E-04                         | 1.31E-05                         |
|                                                    | -2        | 3.23E-05                        | 6.15E-05                        | 3.25E-05                         | 6.51E-05                         |
|                                                    | -1        | -1.15E-04                       | 6.59E-05                        | -1.11E-04                        | 6.86E-05                         |
|                                                    | 0         | 8.55E-07                        | 3.29E-06                        | 1.16E-06                         | 3.27E-06                         |
|                                                    | 1         | 4.09E-05                        | 3.46E-04                        | 4.83E-05                         | 3.46E-04                         |
|                                                    | 2         | 6.74E-05                        | 1.60E-04                        | 6.58E-05                         | 1.61E-04                         |
|                                                    | 3         | 1.68E-04                        | 1.62E-04                        | 1.78E-04                         | 1.69E-04                         |
|                                                    | 4         | 1.58E-05                        | -6.68E-05                       | 1.74E-05                         | -6.99E-05                        |
| 5                                                  | -1.41E-04 | 2.08E-04                        | -1.52E-04                       | 2.23E-04                         |                                  |
| 6                                                  | 1.19E-04  | 1.11E-04                        | 1.22E-04                        | 1.18E-04                         |                                  |



**Table S16.** The computed crystal field parameter of each metal centres in complex 3.

| k                                                  | q        | $B_k^q$                          |                                 |                                 |                                  |
|----------------------------------------------------|----------|----------------------------------|---------------------------------|---------------------------------|----------------------------------|
|                                                    |          | Dy2A (Fig. S8; Dy <sub>b</sub> ) | Dy1 (Fig. S8; Dy <sub>w</sub> ) | Dy2 (Fig. S8; Dy <sub>b</sub> ) | Dy1A (Fig. S8; Dy <sub>w</sub> ) |
| 2                                                  | -2       | -3.24E-01                        | 1.25E+00                        | -3.41E-01                       | 1.25E+00                         |
|                                                    | -1       | 1.99E+00                         | 4.07E-01                        | 1.98E+00                        | 4.07E-01                         |
|                                                    | 0        | -1.16E+00                        | -2.61E+00                       | -1.16E+00                       | -2.61E+00                        |
|                                                    | 1        | -1.39E+00                        | 2.12E+00                        | -1.37E+00                       | 2.11E+00                         |
|                                                    | 2        | 2.97E+00                         | 2.50E-01                        | 2.96E+00                        | 2.52E-01                         |
| $\left/ \frac{Av. axial}{Av. non - axial} \right/$ |          | 6.94E-01                         | 2.59E+00                        | 6.98E-01                        | 2.60E+00                         |
| 4                                                  | -4       | -1.57E-02                        | -1.12E-03                       | -1.56E-02                       | -1.47E-03                        |
|                                                    | -3       | 2.89E-02                         | -3.64E-03                       | 2.94E-02                        | -3.82E-03                        |
|                                                    | -2       | 1.04E-02                         | -1.30E-02                       | 1.06E-02                        | -1.30E-02                        |
|                                                    | -1       | -1.35E-02                        | -4.98E-04                       | -1.35E-02                       | -5.46E-04                        |
|                                                    | 0        | -1.86E-03                        | -5.60E-03                       | -1.87E-03                       | -5.59E-03                        |
|                                                    | 1        | -1.52E-02                        | 7.46E-03                        | -1.52E-02                       | 7.51E-03                         |
|                                                    | 2        | 1.95E-02                         | -7.62E-03                       | 1.96E-02                        | -7.33E-03                        |
|                                                    | 3        | -6.25E-02                        | -6.32E-02                       | -6.24E-02                       | -6.39E-02                        |
| 6                                                  | 4        | -3.76E-03                        | -2.26E-02                       | -3.97E-03                       | -2.26E-02                        |
|                                                    | -6       | -1.35E-04                        | -1.52E-04                       | -1.35E-04                       | -1.49E-04                        |
|                                                    | -5       | -1.87E-04                        | 3.33E-04                        | -1.84E-04                       | 3.17E-04                         |
|                                                    | -4       | -1.24E-04                        | 8.44E-05                        | -1.22E-04                       | 8.41E-05                         |
|                                                    | -3       | -4.59E-05                        | -6.34E-05                       | -4.66E-05                       | -5.94E-05                        |
|                                                    | -2       | -1.23E-04                        | 3.99E-05                        | -1.24E-04                       | 4.25E-05                         |
|                                                    | -1       | 6.98E-05                         | -8.78E-05                       | 7.10E-05                        | -9.25E-05                        |
|                                                    | 0        | -1.61E-05                        | 1.15E-05                        | -1.64E-05                       | 1.13E-05                         |
|                                                    | 1        | 8.18E-05                         | -3.55E-04                       | 8.87E-05                        | -3.58E-04                        |
|                                                    | 2        | 4.70E-05                         | 1.32E-04                        | 4.73E-05                        | 1.33E-04                         |
|                                                    | 3        | -1.26E-04                        | -9.97E-05                       | -1.22E-04                       | -1.08E-04                        |
|                                                    | 4        | 1.65E-04                         | -1.02E-04                       | 1.63E-04                        | -1.03E-04                        |
| 5                                                  | 1.66E-04 | -6.18E-04                        | 1.61E-04                        | -6.31E-04                       |                                  |
| 6                                                  | 6.53E-06 | 2.39E-04                         | 4.56E-06                        | 2.43E-04                        |                                  |

**Table S17.** A comparison of average Dy–O–Dy angle (°) and symbol for exchange interaction in complexes **1–3**.

| Angle<br>(Atom labels in Fig. S8)                                                                                                                     | <b>1</b> | <b>2</b> | <b>3</b> | Symbol for<br>exchange<br>interaction in Fig.<br>12 and text |
|-------------------------------------------------------------------------------------------------------------------------------------------------------|----------|----------|----------|--------------------------------------------------------------|
| Dy1–O2/O5/O7–Dy2 ( <b>1</b> and <b>3</b> );<br>Dy1–O2A/O5A/O7–Dy2A ( <b>2</b> )<br>[Bis(μ-phenoxo)-μ-hydroxo Dy <sub>b</sub> –O–Dy <sub>w</sub> ]     | 94.9     | 95.0     | 95.4     | $J_{bw1}$                                                    |
| Dy1–O4/O7–Dy2A ( <b>1</b> and <b>3</b> );<br>Dy1–O4/O7–Dy2 ( <b>2</b> )<br>[μ-phenoxo-μ-hydroxo Dy <sub>b</sub> –O–Dy <sub>w</sub> ]                  | 110.8    | 110.9    | 110.8    | $J_{bw2}$                                                    |
| Dy1A–O2A/O5A/O7A–Dy2A ( <b>1</b> and <b>3</b> );<br>Dy1A–O2/O5/O7A–Dy2 ( <b>2</b> )<br>[Bis(μ-phenoxo)-μ-hydroxo Dy <sub>b</sub> –O–Dy <sub>w</sub> ] | 94.9     | 95.0     | 95.4     | $J_{bw1}$                                                    |
| Dy1A–O4A/O7A–Dy2 ( <b>1</b> and <b>3</b> );<br>Dy1A–O4A/O7A–Dy2A ( <b>2</b> )<br>[μ-phenoxo-μ-hydroxo Dy <sub>b</sub> –O–Dy <sub>w</sub> ]            | 110.8    | 110.9    | 110.8    | $J_{bw2}$                                                    |
| Dy2–O7/O7A–Dy2A ( <b>1</b> , <b>2</b> and <b>3</b> )<br>[Bis(μ-hydroxo) Dy <sub>b</sub> –O–Dy <sub>b</sub> ]                                          | 110.9    | 110.1    | 110.4    | $J_{bb}$                                                     |

**Table S18.** Simplified pictorial presentation, formula and magnetic parameters of the Dy<sup>III</sup><sub>4</sub> defect dicubane compounds derived from 2-(2-hydroxy-3-ethoxybenzylideneamino)phenol, H<sub>2</sub>L (OEt ligand), and 2-(2-hydroxy-3-methoxybenzylideneamino)phenol, H<sub>2</sub>L' (OMe ligand).

| Formula and Simplified Pictorial Presentation                                                                                                                                                                                            | $U_{\text{eff}}$      | $\tau_0$                | Coordination No.                               | Two-step relaxation process identified or mentioned | Ref.      |
|------------------------------------------------------------------------------------------------------------------------------------------------------------------------------------------------------------------------------------------|-----------------------|-------------------------|------------------------------------------------|-----------------------------------------------------|-----------|
| 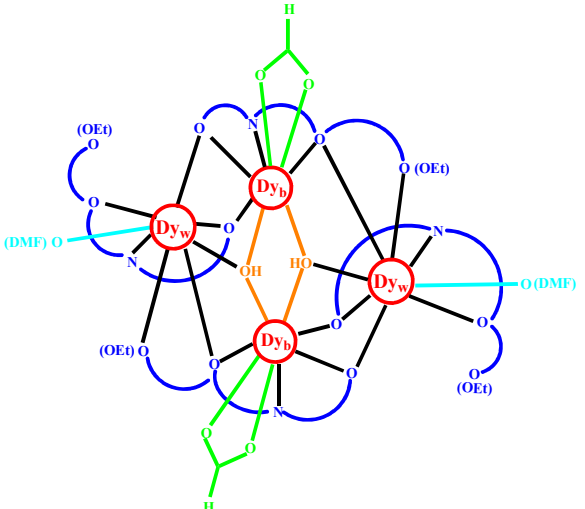 <p data-bbox="280 1013 772 1056"><math>[\text{Dy}^{\text{III}}_4\text{L}_4(\mu_3\text{-OH})_2(\text{formate})_2(\text{dmf})_2] \text{ (1)}</math></p> | 49.0 cm <sup>-1</sup> | $1.76 \times 10^{-7}$ s | 8 for Dy <sub>b</sub><br>8 for Dy <sub>w</sub> | Yes                                                 | This work |

|                                                                                                                                                                                                              |                       |                         |                                            |     |           |
|--------------------------------------------------------------------------------------------------------------------------------------------------------------------------------------------------------------|-----------------------|-------------------------|--------------------------------------------|-----|-----------|
| 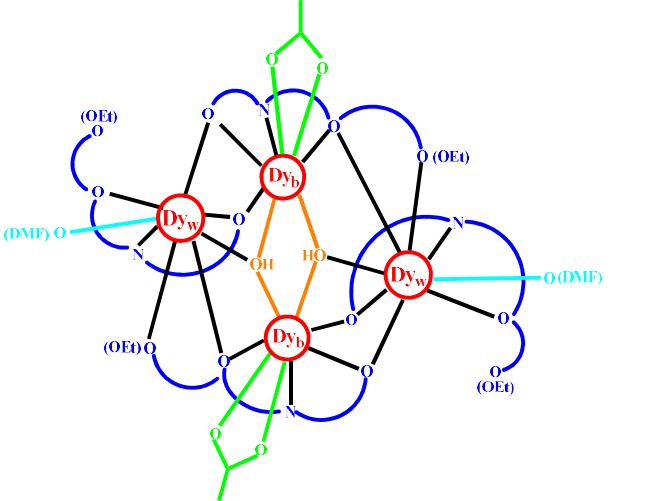 <p><math>[\text{Dy}^{\text{III}}_4\text{L}_4(\mu_3\text{-OH})_2(\text{acetate})_2(\text{dmf})_2]</math> (<b>2</b>)</p>     | 30.3 $\text{cm}^{-1}$ | $1.51 \times 10^{-8}$ s | 8 for $\text{Dy}_b$<br>8 for $\text{Dy}_w$ | Yes | This work |
|  <p><math>[\text{Dy}^{\text{III}}_4\text{L}_4(\mu_3\text{-OH})_2(\text{propionate})_2(\text{dmf})_2]</math> (<b>3</b>)</p> | 23.4 $\text{cm}^{-1}$ | $9.64 \times 10^{-7}$ s | 8 for $\text{Dy}_b$<br>8 for $\text{Dy}_w$ | Yes | This work |

|                                                                                                                                                                                                                                         |                                                                                 |                                                                                 |                                                                          |                       |           |
|-----------------------------------------------------------------------------------------------------------------------------------------------------------------------------------------------------------------------------------------|---------------------------------------------------------------------------------|---------------------------------------------------------------------------------|--------------------------------------------------------------------------|-----------------------|-----------|
| 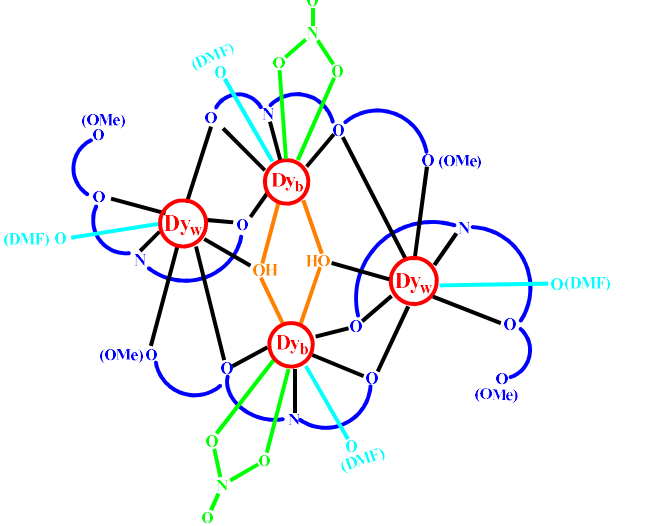 <p><math>[\text{Dy}^{\text{III}}_4\text{L}'_4(\mu_3\text{-OH})_2(\text{dmf})_4(\text{NO}_3)_2]\cdot 2\text{dmf}\cdot\text{H}_2\text{O}</math> (I)</p> | <p>Could not be evaluated as no maximum for <math>\chi_M''</math> up to 2 K</p> | <p>Could not be evaluated as no maximum for <math>\chi_M''</math> up to 2 K</p> | <p>9 for <math>\text{Dy}_b</math><br/>8 for <math>\text{Dy}_w</math></p> | <p>Not Applicable</p> | <p>S1</p> |
|  <p><math>[\text{Dy}^{\text{III}}_4\text{L}'_4(\mu_3\text{-OH})_2(\text{dmf})_2(\text{tfaa})_2]\cdot 2\text{CH}_3\text{CN}</math> (II)</p>            | <p><math>27.1\text{ cm}^{-1}</math></p>                                         | <p><math>2.09 \times 10^{-5}\text{ s}</math></p>                                | <p>8 for <math>\text{Dy}_b</math><br/>8 for <math>\text{Dy}_w</math></p> | <p>Yes</p>            | <p>S1</p> |

|                                                                                                                                                                                                                                          |                       |                         |                                            |     |    |
|------------------------------------------------------------------------------------------------------------------------------------------------------------------------------------------------------------------------------------------|-----------------------|-------------------------|--------------------------------------------|-----|----|
| 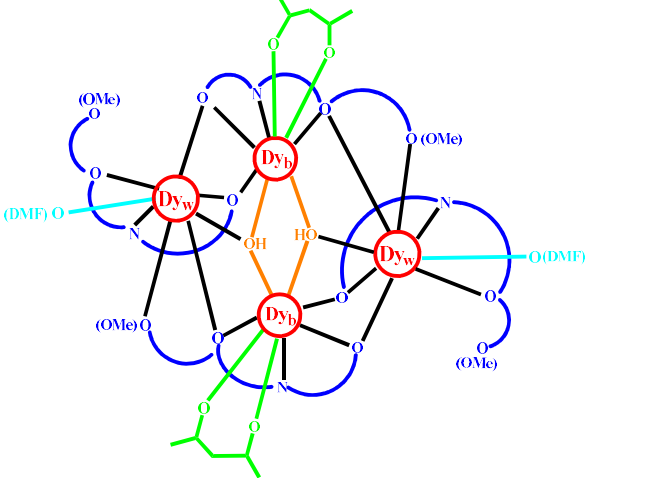 <p><math>[\text{Dy}^{\text{III}}_4\text{L}'_4(\mu_3\text{-OH})_2(\text{dmf})_2(\text{acac})_2]\cdot 2\text{dmf}</math> (III)</p>                       | 65.3 $\text{cm}^{-1}$ | $9.62 \times 10^{-7}$ s | 8 for $\text{Dy}_b$<br>8 for $\text{Dy}_w$ | Yes | S1 |
|  <p><math>[\text{Dy}^{\text{III}}_4\text{L}'_4(\mu_3\text{-OH})_2(\text{dmf})_2(\text{trimethylacetate})_2]\cdot 2\text{CH}_3\text{CN}</math> (IV)</p> | 38.9 $\text{cm}^{-1}$ | $2.66 \times 10^{-8}$ s | 8 for $\text{Dy}_b$<br>8 for $\text{Dy}_w$ | Yes | S2 |

|                                                                                                                                                                                                                             |                       |                         |                                            |     |    |
|-----------------------------------------------------------------------------------------------------------------------------------------------------------------------------------------------------------------------------|-----------------------|-------------------------|--------------------------------------------|-----|----|
| 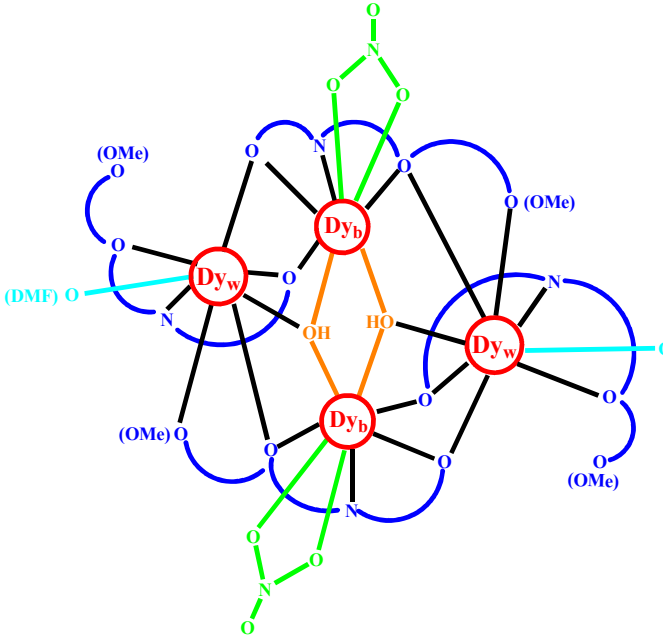 <p data-bbox="380 861 851 893"><math>[\text{Dy}^{\text{III}}_4\text{L}'_4(\mu_3\text{-OH})_2(\text{dmf})_2(\text{NO}_3)_2]</math> (V)</p> | 79.2 $\text{cm}^{-1}$ | $1.58 \times 10^{-9}$ s | 8 for $\text{Dy}_b$<br>8 for $\text{Dy}_w$ | Yes | S3 |
|-----------------------------------------------------------------------------------------------------------------------------------------------------------------------------------------------------------------------------|-----------------------|-------------------------|--------------------------------------------|-----|----|

|                                                                                                                                                                                                                                                             |                                                               |                                                            |                                            |     |    |
|-------------------------------------------------------------------------------------------------------------------------------------------------------------------------------------------------------------------------------------------------------------|---------------------------------------------------------------|------------------------------------------------------------|--------------------------------------------|-----|----|
| 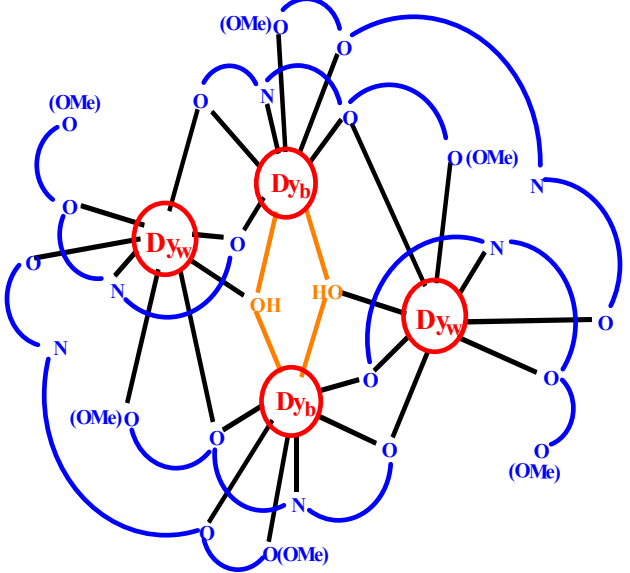 <p><math>[\text{Dy}^{\text{III}}_4\text{L}'_4(\mu_3\text{-OH})_2(\text{HL}')_2]\cdot 2\text{THF}</math> (VI)</p>                                                          | $2.6\text{ cm}^{-1}$                                          | $4.8 \times 10^{-5}\text{ s}$                              | 8 for $\text{Dy}_b$<br>8 for $\text{Dy}_w$ | No  | S4 |
|  <p><math>[\text{Dy}^{\text{III}}_4\text{L}'_4(\mu_3\text{-OH})_2(\text{acac})_2(\text{H}_2\text{O})_2(\text{C}_5\text{H}_5\text{N})_2]\cdot 2\text{THF}</math> (VII)</p> | $25.7\text{ cm}^{-1}$ at 5 K<br>$54.2\text{ cm}^{-1}$ at 13 K | $5 \times 10^{-7}\text{ s}$<br>$7 \times 10^{-7}\text{ s}$ | 8 for $\text{Dy}_b$<br>9 for $\text{Dy}_w$ | Yes | S5 |



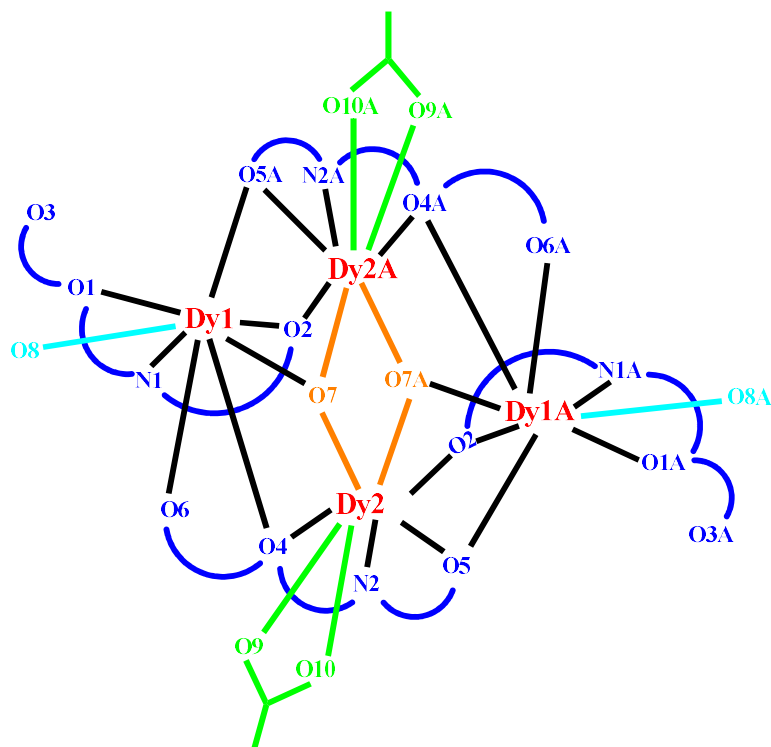

**Scheme S1.** Simplified schematic presentation of  $[\text{Dy}^{\text{III}}_4\text{L}_4(\mu_3\text{-OH})_2(\text{acetate})_2(\text{dmf})_2]$  (**2**). Colour: Blue –  $[\text{L}]^{2-}$ ; Orange – Hydroxo; Green – Carboxylate; Cyan – dmf.

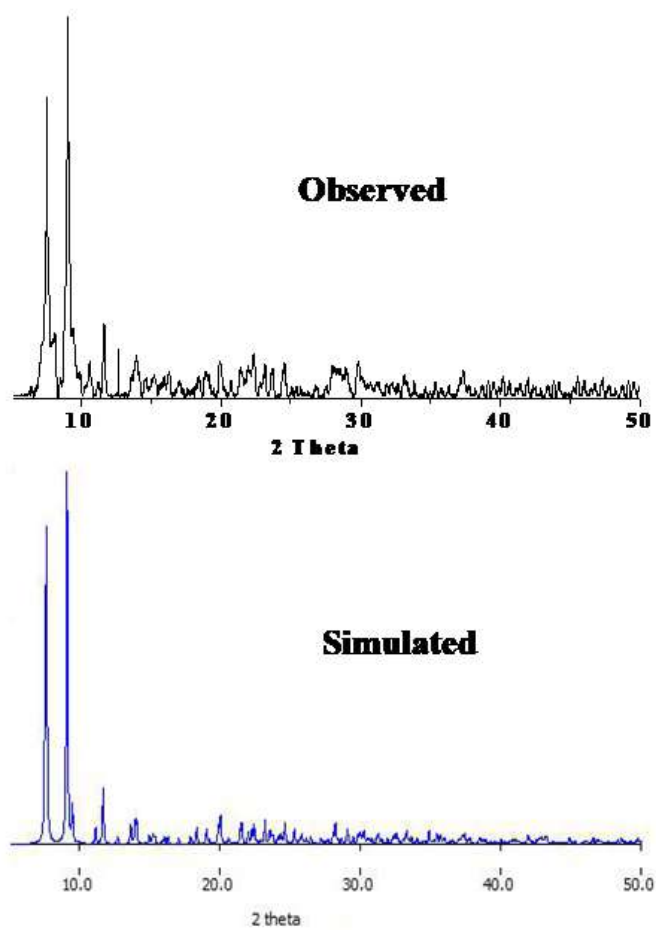

**Fig. S1.** Simulated (blue) and observed (black) powder X-ray diffraction (PXRD) patterns of  $[\text{Dy}^{\text{III}}_4\text{L}_4(\text{OH})_2(\text{formate})_2(\text{dmf})_2]$  (1).

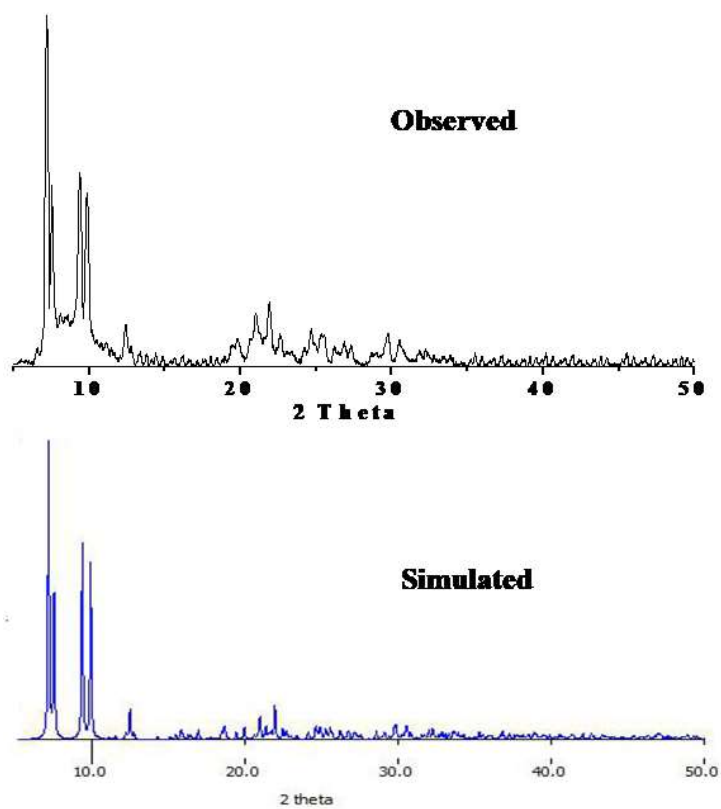

**Fig. S2.** Simulated (blue) and observed (black) powder X-ray diffraction (PXRD) patterns of  $[\text{Dy}^{\text{III}}_4\text{L}_4(\mu_3\text{-OH})_2(\text{acetate})_2(\text{dmf})_2]$  (2).

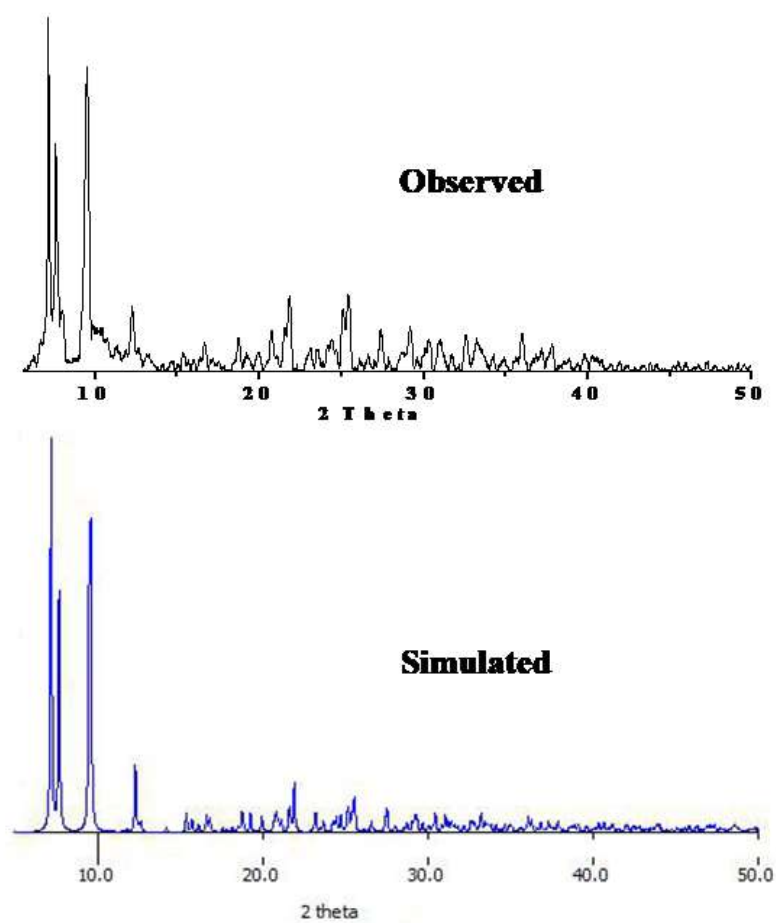

**Fig. S3.** Simulated (blue) and observed (black) powder X-ray diffraction (PXRD) patterns of  $[\text{Dy}^{\text{III}}_4\text{L}_4(\mu_3\text{-OH})_2(\text{propionate})_2(\text{dmf})_2]$  (3).

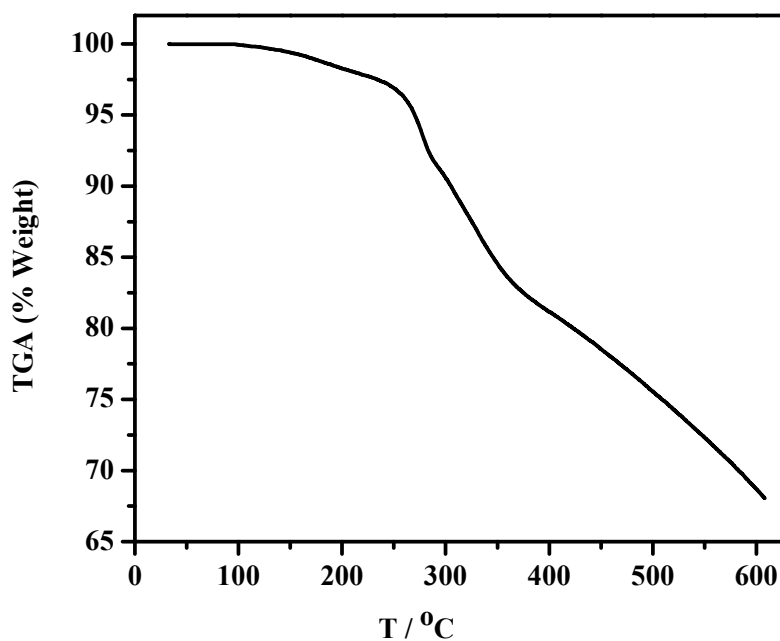

**Fig. S4.** Thermogravimetric analysis (TGA) curve of  $[\text{Dy}^{\text{III}}_4\text{L}_4(\mu_3\text{-OH})_2(\text{acetate})_2(\text{dmf})_2]$  (**2**) in nitrogen atmosphere.

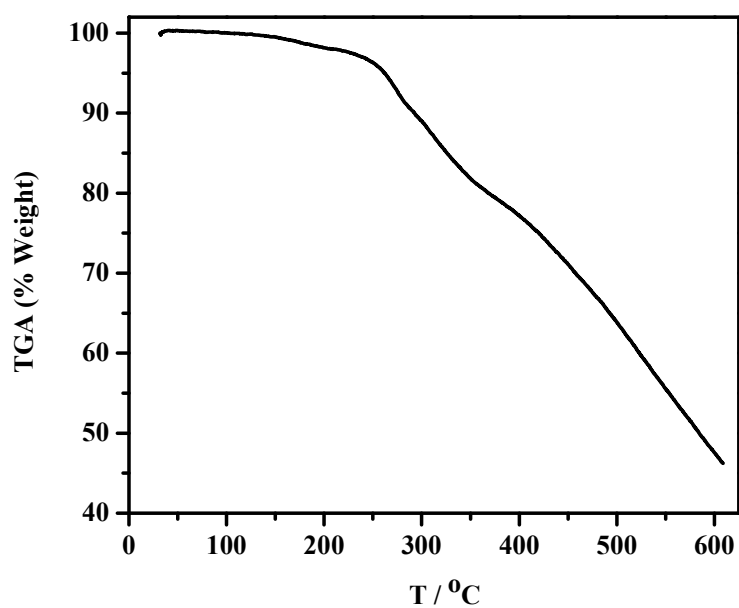

**Fig. S5.** Thermogravimetric analysis (TGA) curve of  $[\text{Dy}^{\text{III}}_4\text{L}_4(\mu_3\text{-OH})_2(\text{propionate})_2(\text{dmf})_2]$  (**3**) in nitrogen atmosphere.

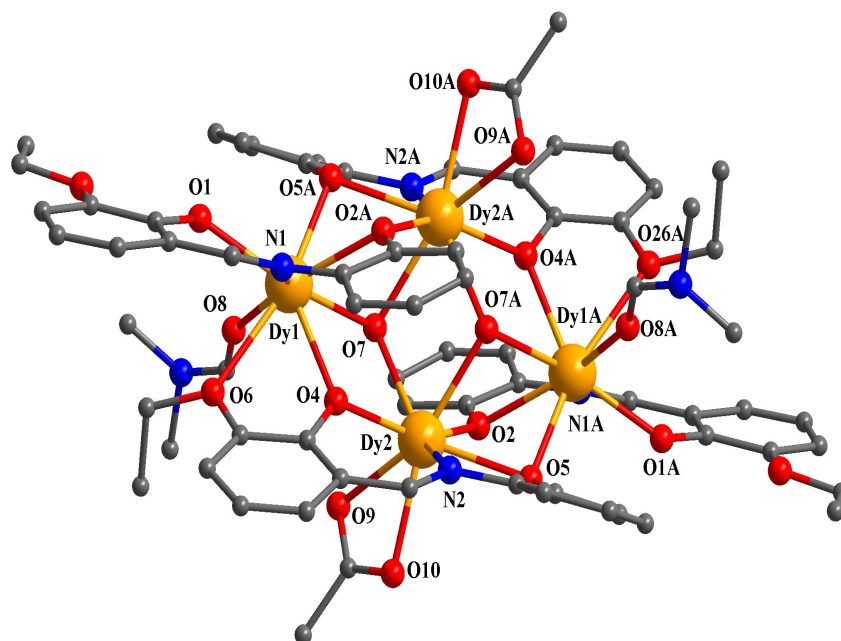

**Fig. S6.** Crystal structure of  $[\text{Dy}^{\text{III}}_4\text{L}_4(\mu_3\text{-OH})_2(\text{acetate})_2(\text{dmf})_2]$  (**2**). Hydrogen atoms are omitted for clarity. Symmetry code: A,  $2-x$ ,  $2-y$ ,  $2-z$ .

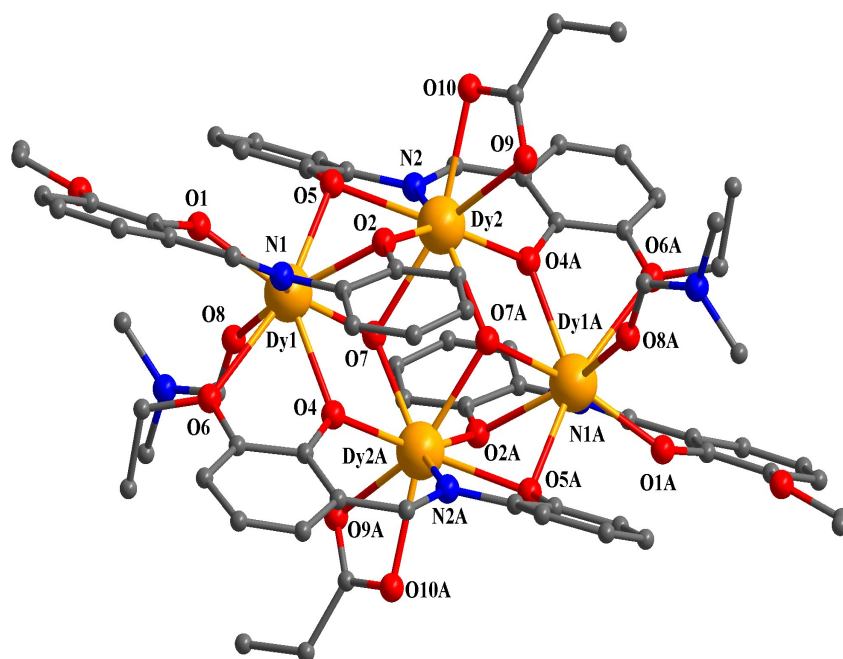

**Fig. S7.** Crystal structure of  $[\text{Dy}^{\text{III}}_4\text{L}_4(\mu_3\text{-OH})_2(\text{propionate})_2(\text{dmf})_2]$  (**3**). Hydrogen atoms are omitted for clarity. Symmetry code: A,  $1-x$ ,  $2-y$ ,  $2-z$ .

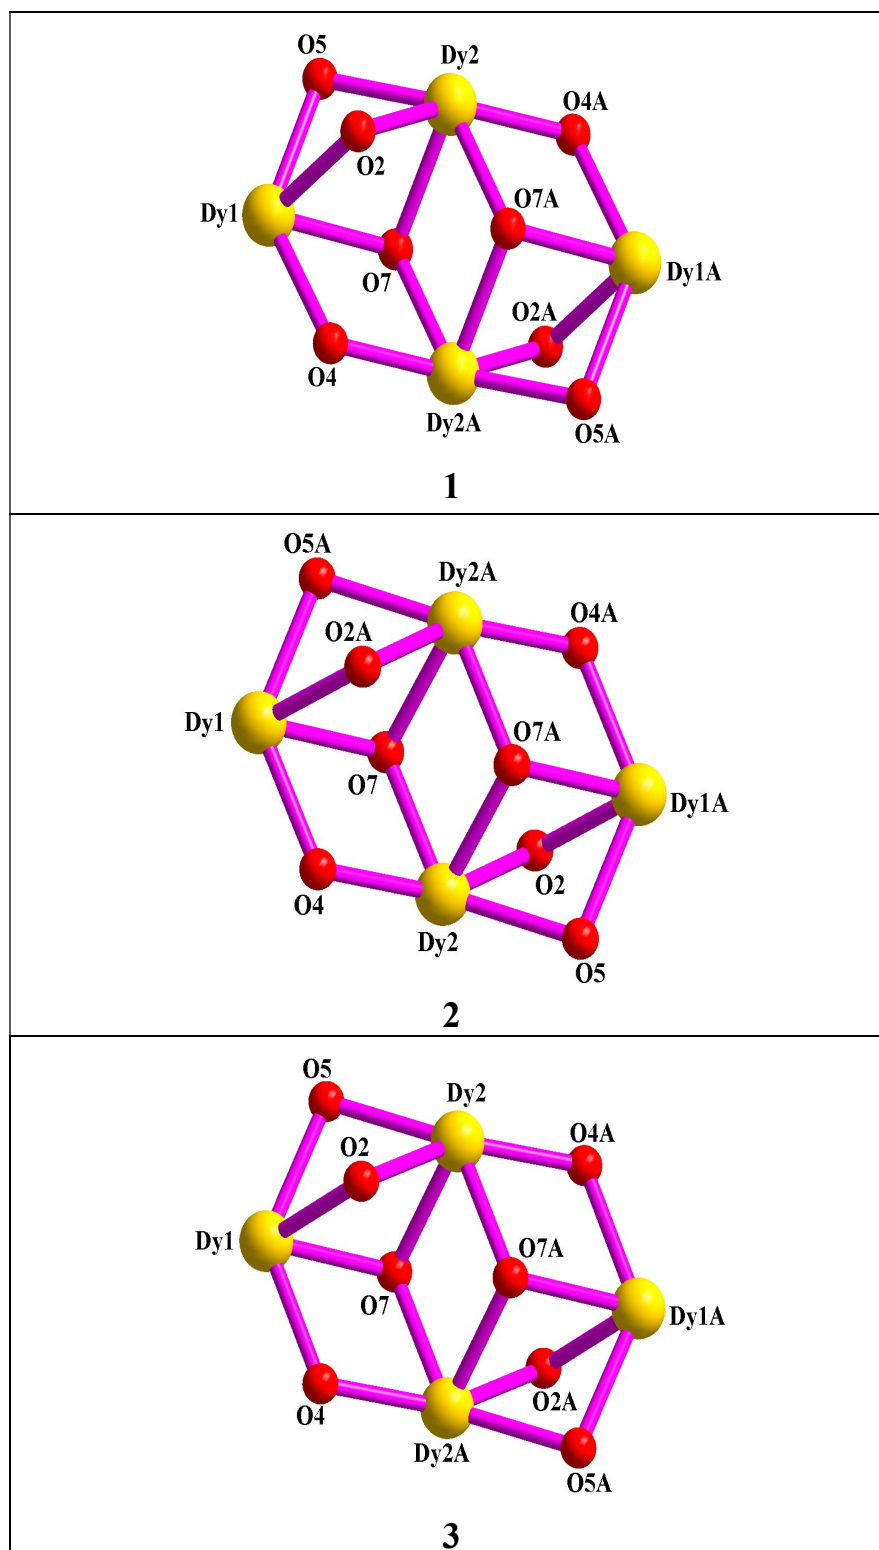

**Fig. S8.** Perspective views showing defect dicubane DyO<sub>8</sub> core in **1**, **2** and **3** (O<sub>8</sub> represents eight bridging phenoxo and hydroxo oxygen atoms). Symmetry code: A, 1-x, 2-y, 2-z.

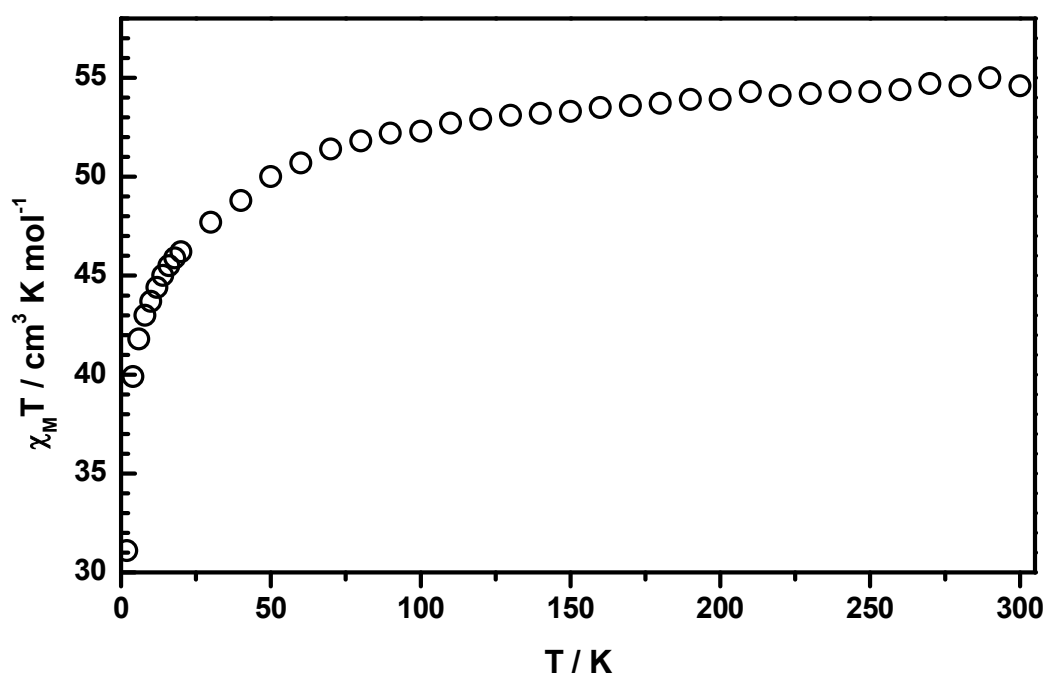

**Fig. S9.** Temperature dependence of the magnetic susceptibility in  $\chi_M T$  vs  $T$  for  $[\text{Dy}^{\text{III}}_4\text{L}_4(\mu_3\text{-OH})_2(\text{acetate})_2(\text{dmf})_2]$  (**2**).

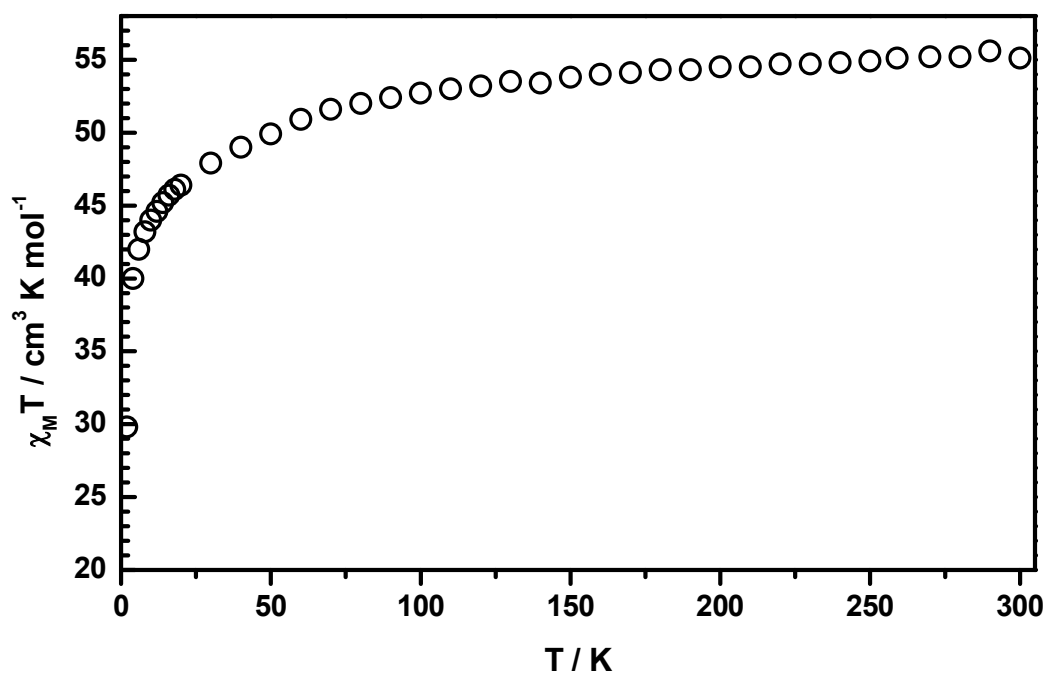

**Fig. S10.** Temperature dependence of the magnetic susceptibility in  $\chi_M T$  vs  $T$  for  $[\text{Dy}^{\text{III}}_4\text{L}_4(\mu_3\text{-OH})_2(\text{propionate})_2(\text{dmf})_2]$  (**3**).



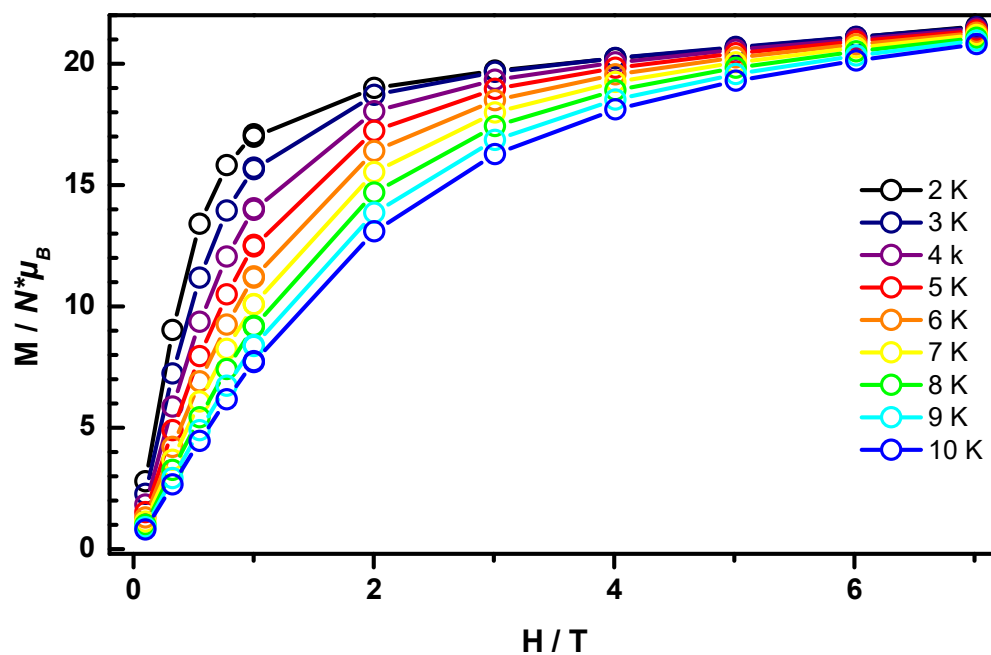

**Fig. S11.** Magnetization of  $[\text{Dy}^{\text{III}}_4\text{L}_4(\mu_3\text{-OH})_2(\text{acetate})_2(\text{dmf})_2]$  (**2**) in M vs H. The solid lines are guidelines for eyes.

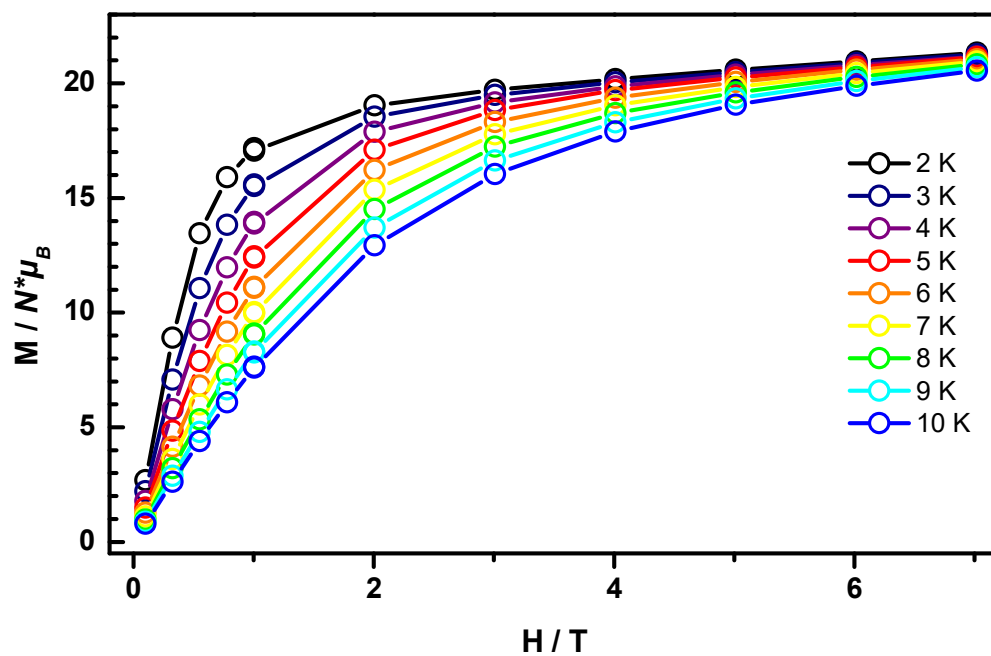

**Fig. S12.** Magnetization of  $[\text{Dy}^{\text{III}}_4\text{L}_4(\mu_3\text{-OH})_2(\text{propionate})_2(\text{dmf})_2]$  (**3**) in M vs H. The solid lines are guidelines for eyes.

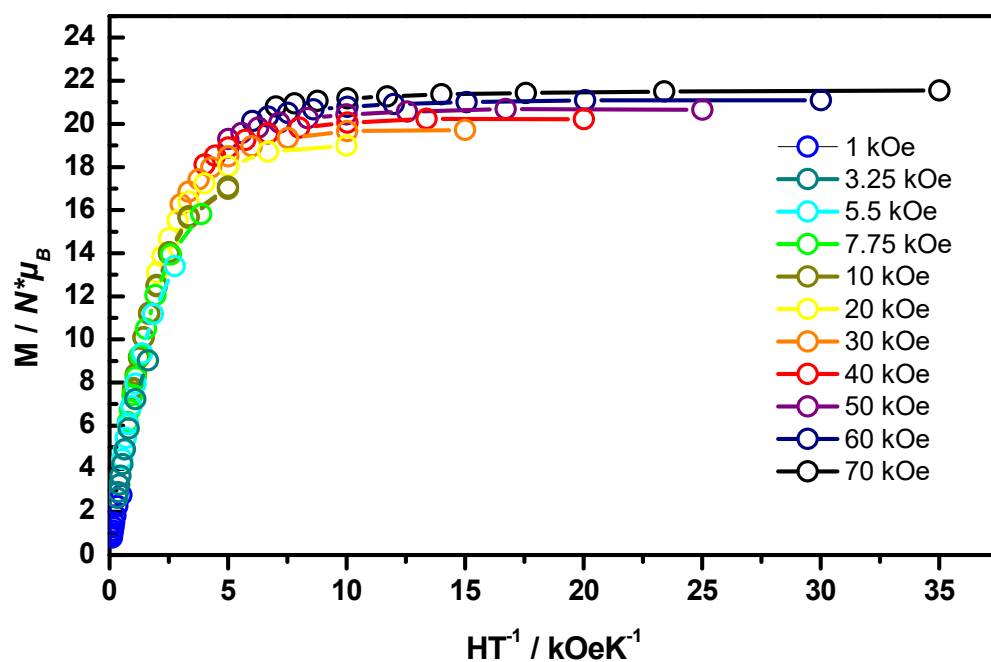

**Fig. S13.** Reduced magnetization of  $[\text{Dy}^{\text{III}}_4\text{L}_4(\mu_3\text{-OH})_2(\text{acetate})_2(\text{dmf})_2]$  (2) in  $M$  vs  $HT^{-1}$ . The solid lines are guidelines for eyes.

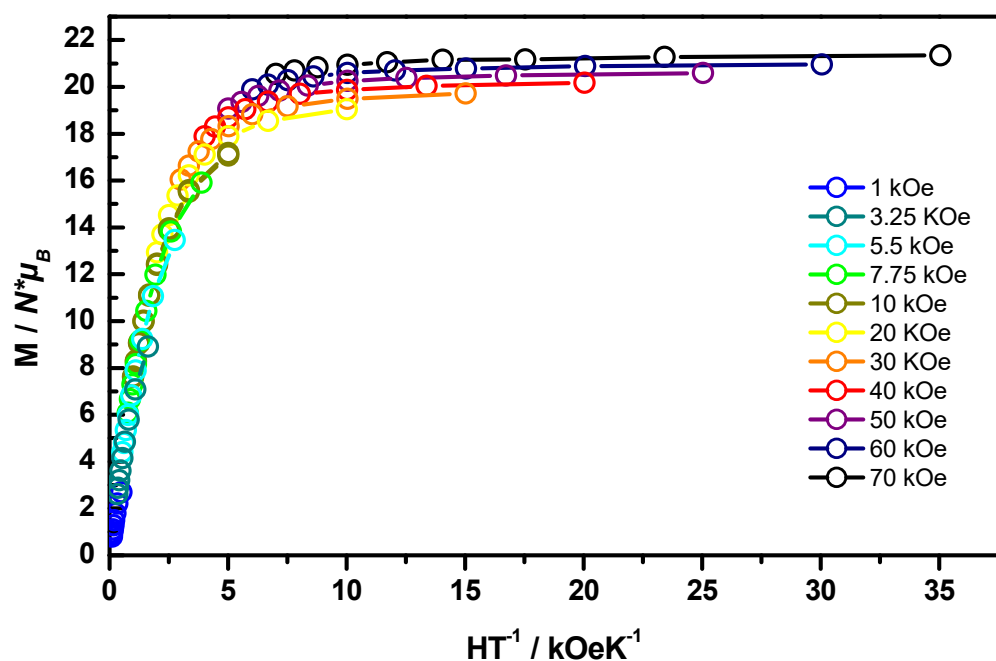

**Fig. S14.** Reduced magnetization of  $[\text{Dy}^{\text{III}}_4\text{L}_4(\mu_3\text{-OH})_2(\text{propionate})_2(\text{dmf})_2]$  (3) in  $M$  vs  $HT^{-1}$ . The solid lines are guidelines for eyes.

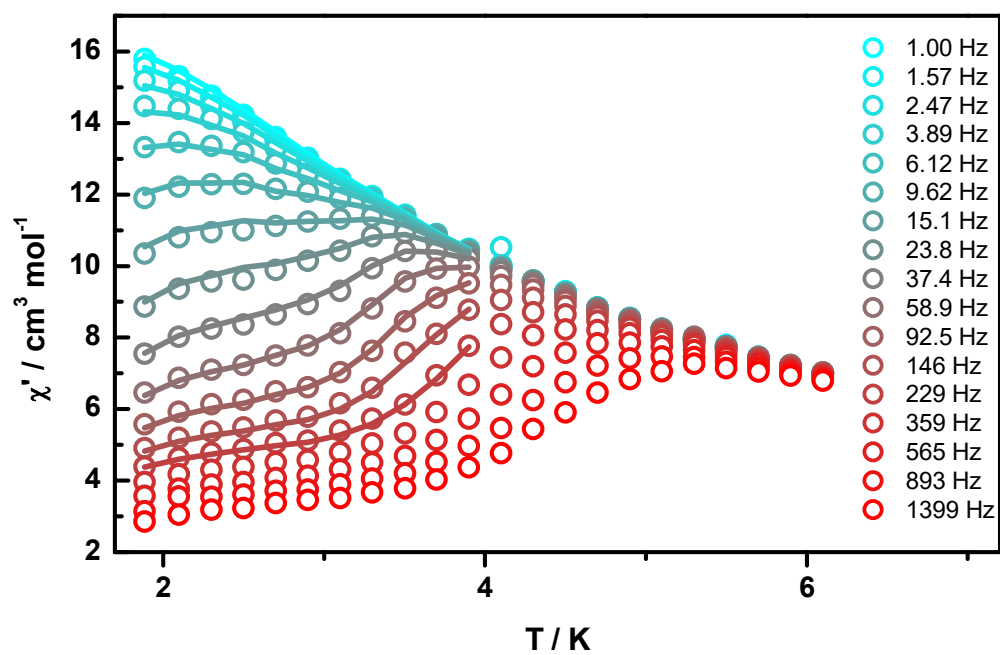

**Fig. S15.** Plots of the in-phase signal vs  $T$  at different frequencies for  $[\text{Dy}^{\text{III}}_4\text{L}_4(\mu_3\text{-OH})_2(\text{acetate})_2(\text{dmf})_2]$  (2). Solid lines correspond to the best fit.

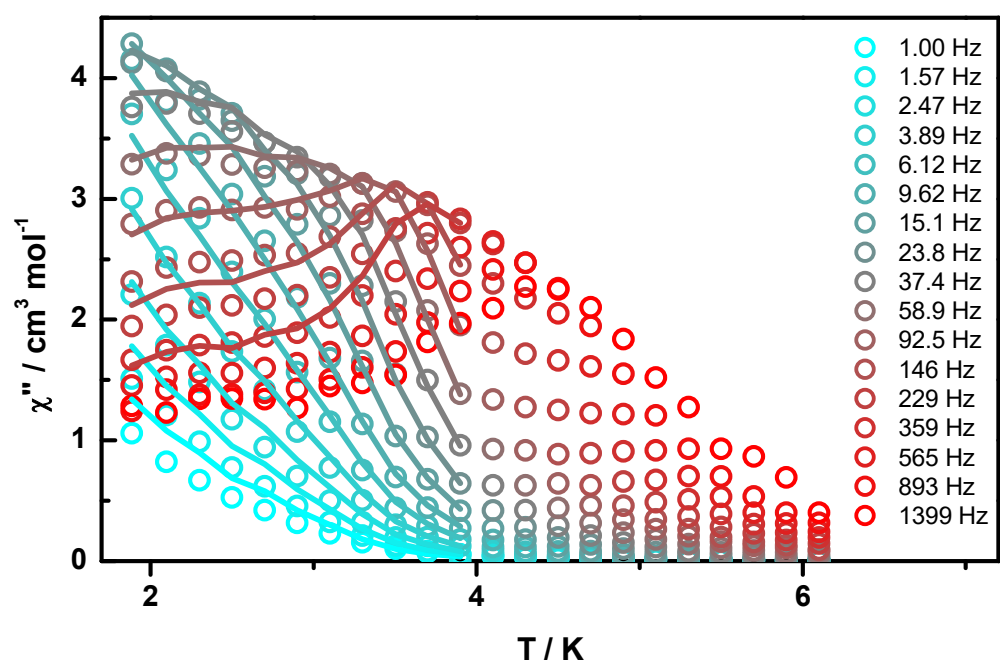

**Fig. S16.** Plots of the out-of-phase signal vs  $T$  at different frequencies for  $[\text{Dy}^{\text{III}}_4\text{L}_4(\mu_3\text{-OH})_2(\text{acetate})_2(\text{dmf})_2]$  (2). Solid lines correspond to the best fit.

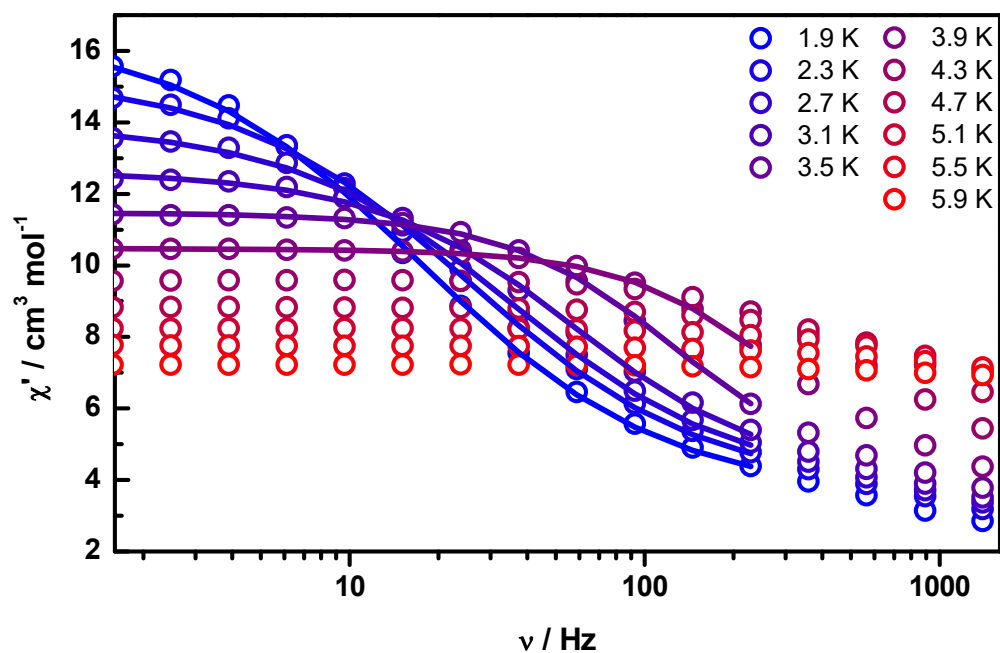

**Fig. S17.** Plots of the in-phase signal vs  $\nu$  at selected temperatures ( $\Delta$  0.4 K) for  $[\text{Dy}^{\text{III}}_4\text{L}_4(\mu_3\text{-OH})_2(\text{acetate})_2(\text{dmf})_2]$  (2). Solid lines correspond to the best fit.

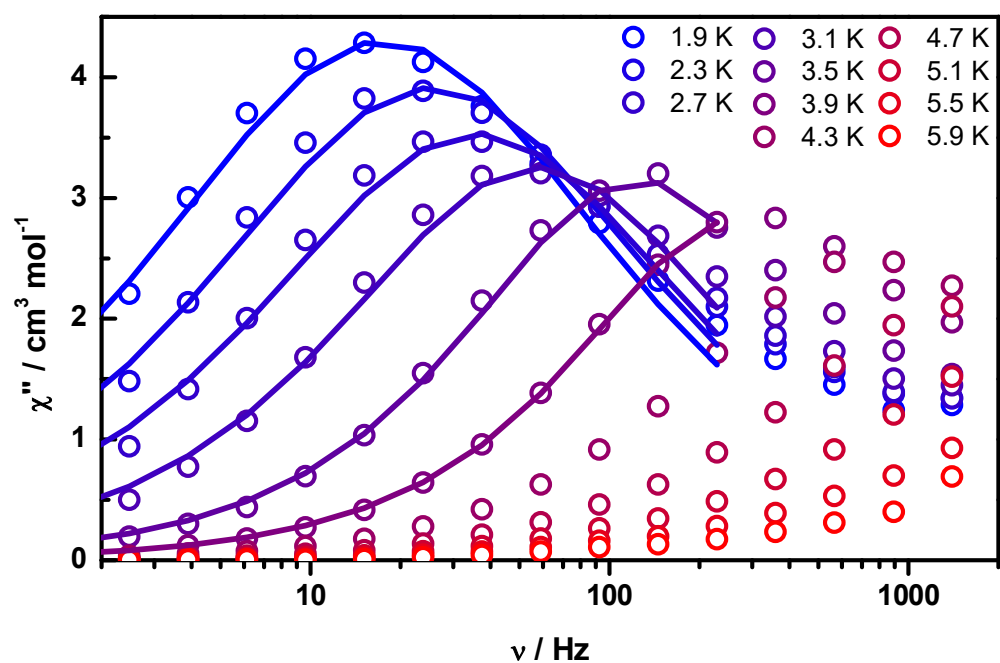

**Fig. S18.** Plots of the out-of-phase signal vs  $\nu$  at selected temperatures ( $\Delta$  0.4 K) for  $[\text{Dy}^{\text{III}}_4\text{L}_4(\mu_3\text{-OH})_2(\text{acetate})_2(\text{dmf})_2]$  (2). Solid lines correspond to the best fit.

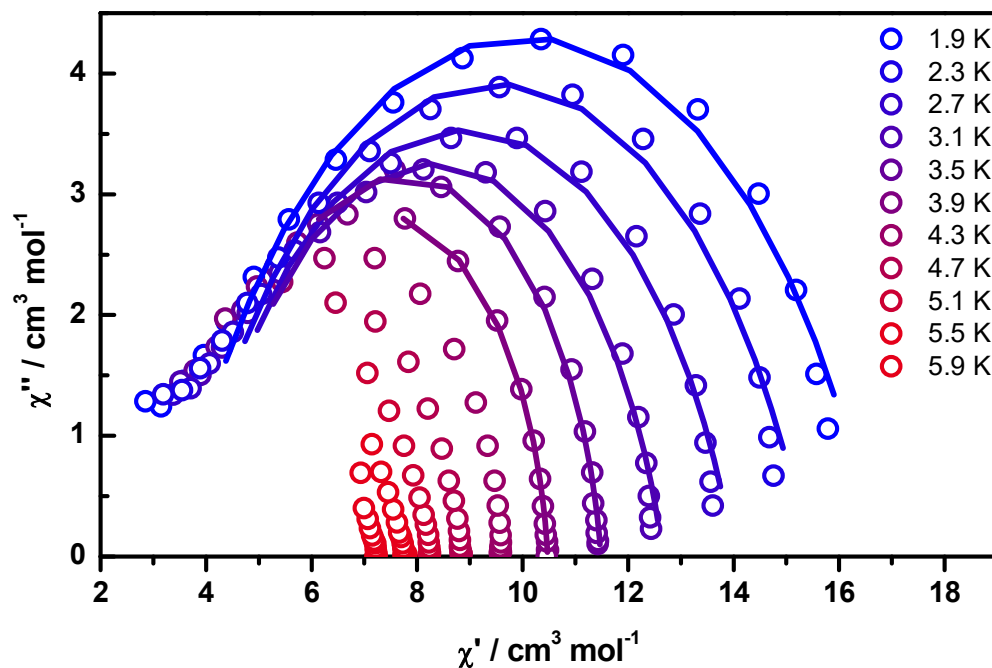

**Fig. S19.** Cole-Cole plots of the out-of-phase signal vs the in-phase signal at selected temperatures ( $\Delta 0.4$  K) for  $[\text{Dy}^{\text{III}}_4\text{L}_4(\mu_3\text{-OH})_2(\text{acetate})_2(\text{dmf})_2]$  (2). Solid lines correspond to the best fit.

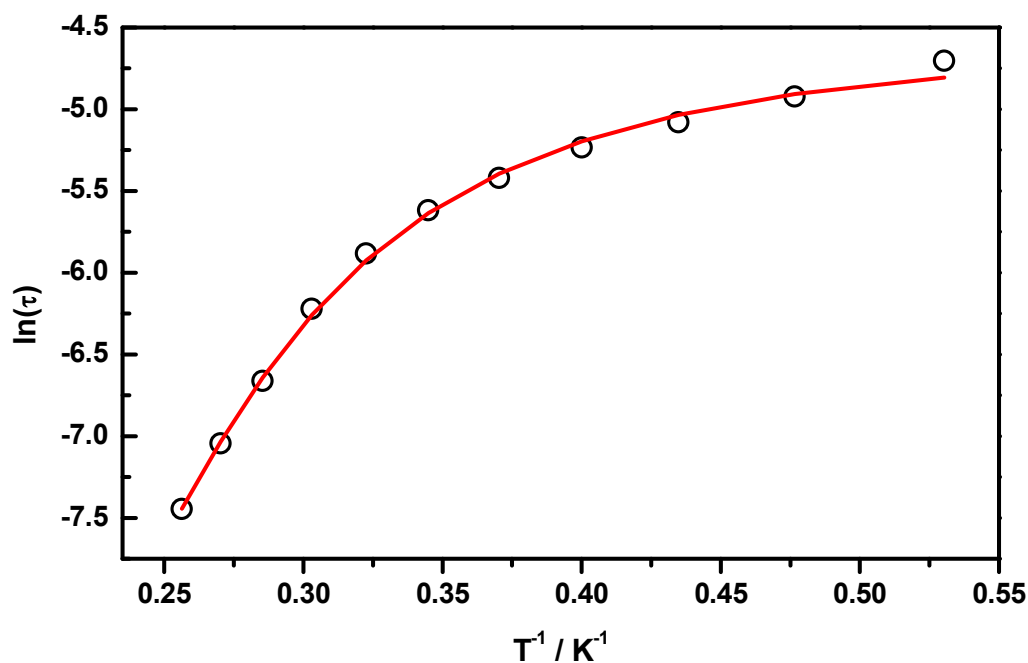

**Fig. S20.** Plot of the natural logarithm of the relaxation time versus the reciprocal temperature for  $[\text{Dy}^{\text{III}}_4\text{L}_4(\mu_3\text{-OH})_2(\text{acetate})_2(\text{dmf})_2]$  (2). Solid lines correspond to the best fit with the values given in the text.

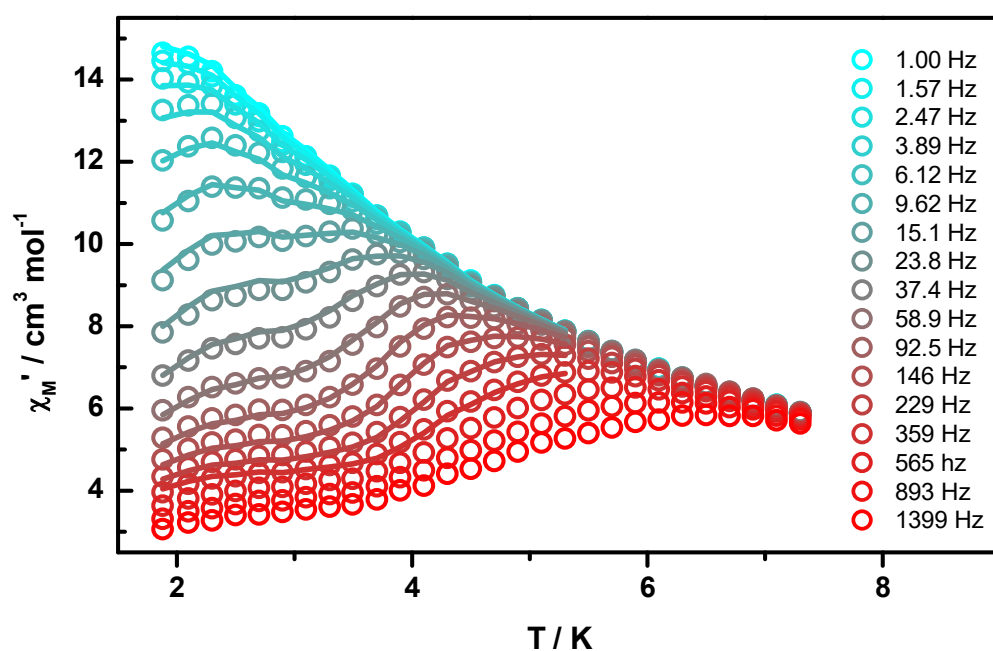

**Fig. S21.** Plots of the in-phase signal vs  $T$  at different frequencies for  $[\text{Dy}^{\text{III}}_4\text{L}_4(\mu_3\text{-OH})_2(\text{propionate})_2(\text{dmf})_2]$  (**3**). Solid lines correspond to the best fit.

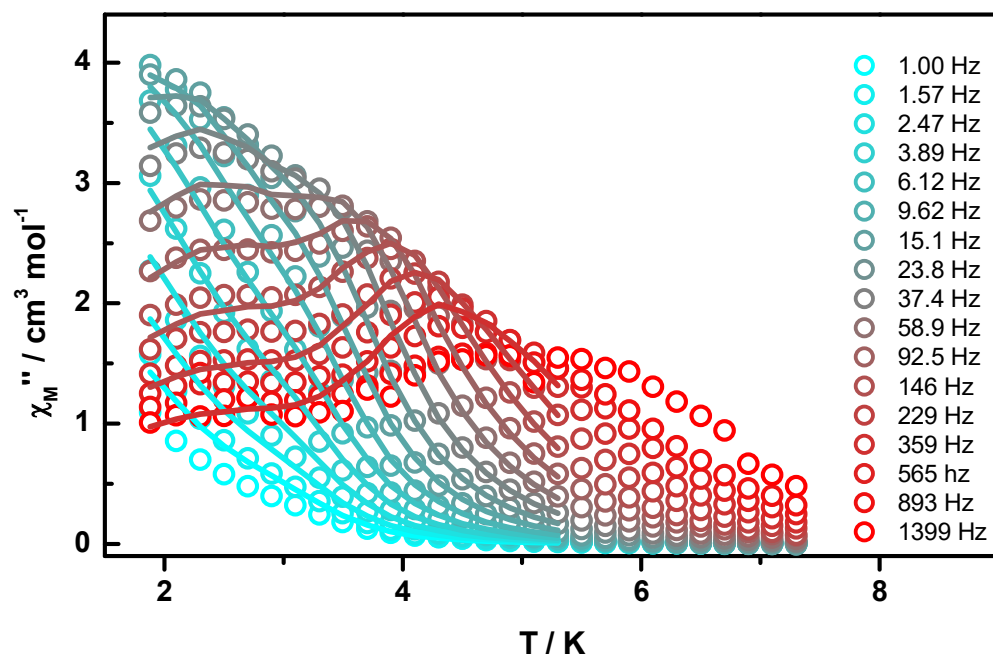

**Fig. S22.** Plots of the out-of-phase signal vs  $T$  at different frequencies for  $[\text{Dy}^{\text{III}}_4\text{L}_4(\mu_3\text{-OH})_2(\text{propionate})_2(\text{dmf})_2]$  (**3**). Solid lines correspond to the best fit.

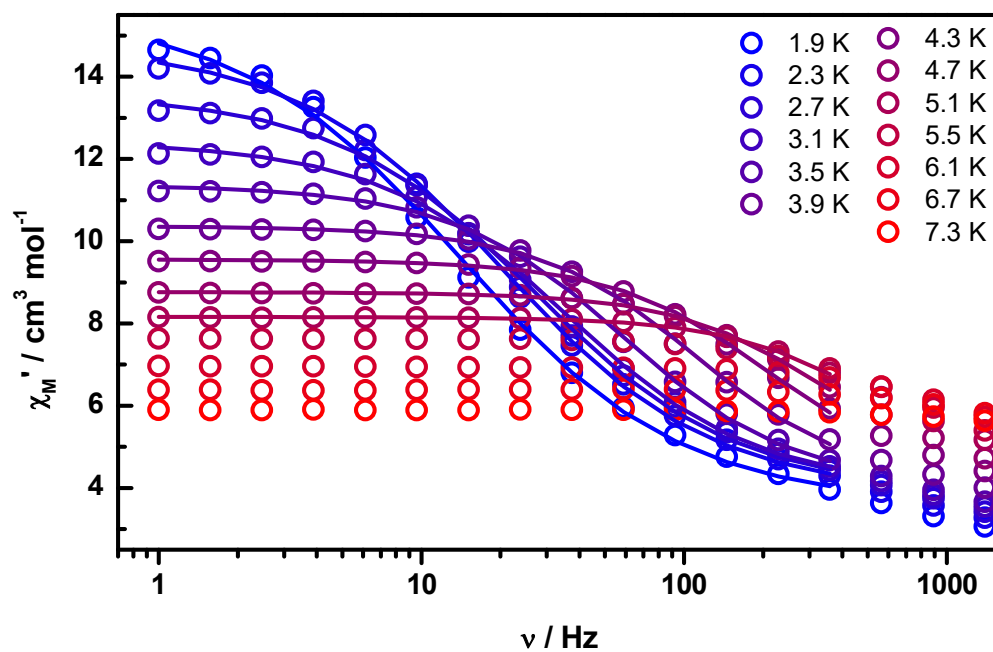

**Fig. S23.** Plots of the in-phase signal vs  $\nu$  at selected temperatures ( $\Delta$  0.4 K) for  $[\text{Dy}^{\text{III}}_4\text{L}_4(\mu_3\text{-OH})_2(\text{propionate})_2(\text{dmf})_2]$  (3). Solid lines correspond to the best fit.

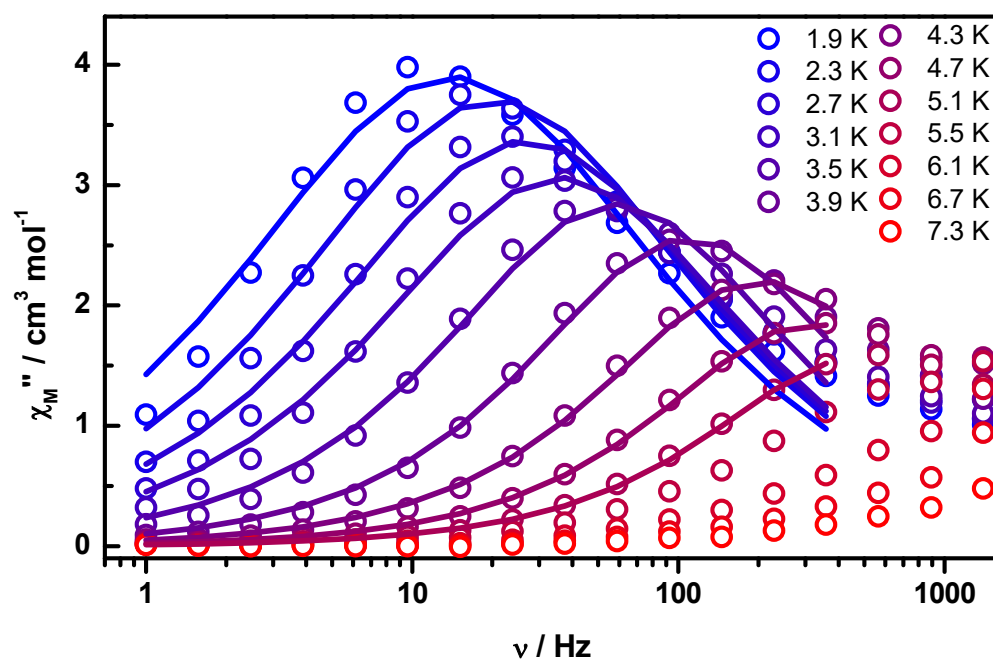

**Fig. S24.** Plots of the out-of-phase signal vs  $\nu$  at selected temperatures ( $\Delta$  0.4 K) for  $[\text{Dy}^{\text{III}}_4\text{L}_4(\mu_3\text{-OH})_2(\text{propionate})_2(\text{dmf})_2]$  (3). Solid lines correspond to the best fit.

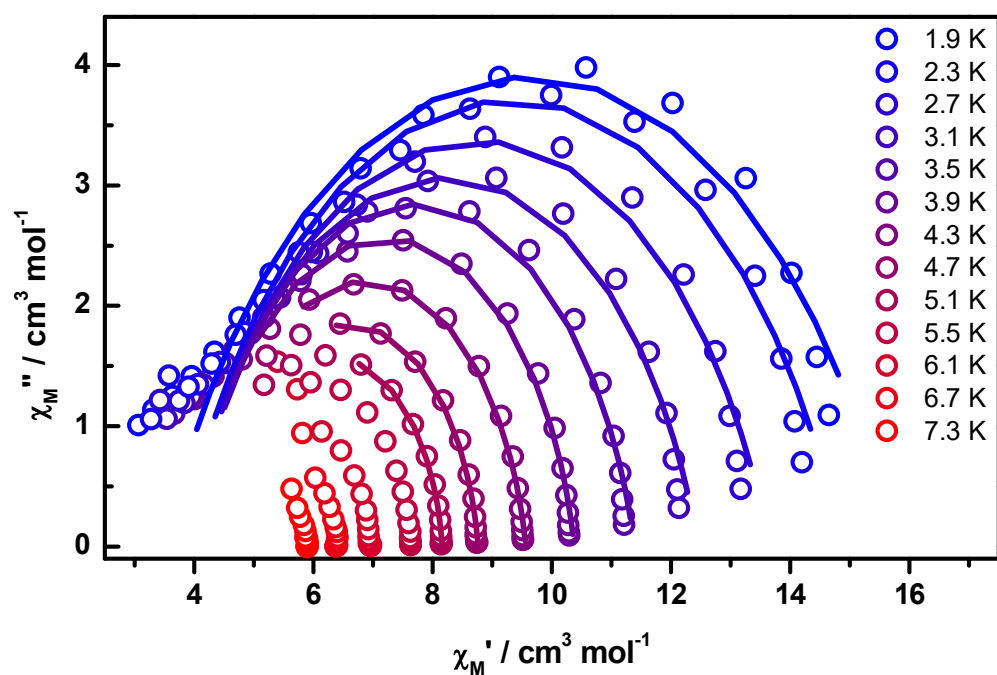

**Fig. S25.** Cole-Cole Plots of the out-of-phase signal vs the in-phase signal at selected temperatures ( $\Delta 0.4$  K) for  $[\text{Dy}^{\text{III}}_4\text{L}_4(\mu_3\text{-OH})_2(\text{propionate})_2(\text{dmf})_2]$  (3). Solid lines correspond to the best fit.

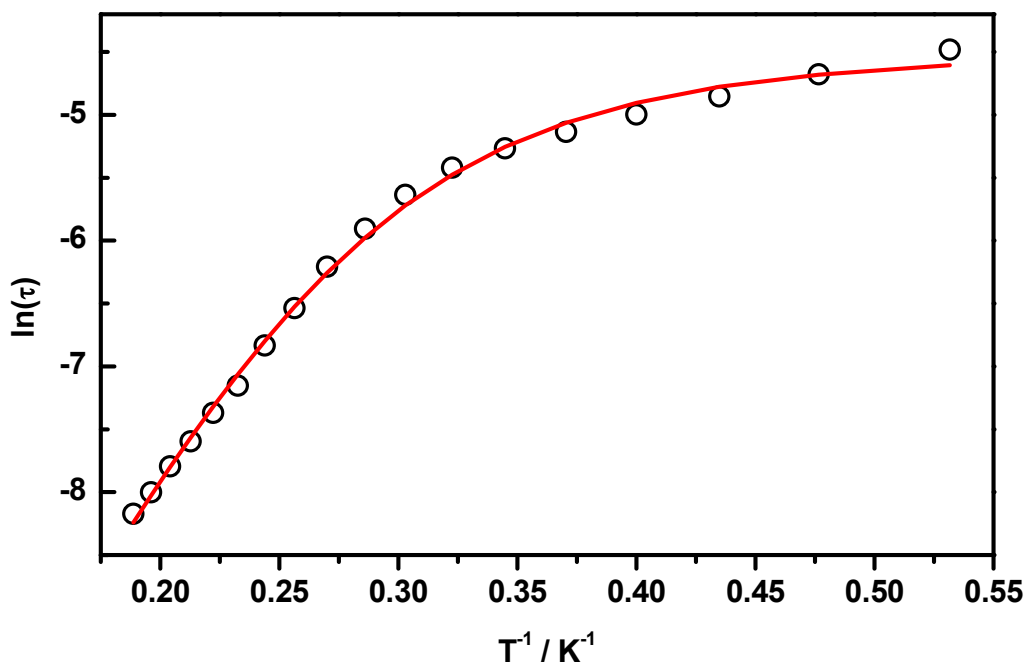

**Fig. S26.** Plot of the natural logarithm of the relaxation time versus the reciprocal temperature for  $[\text{Dy}^{\text{III}}_4\text{L}_4(\mu_3\text{-OH})_2(\text{propionate})_2(\text{dmf})_2]$  (3). Solid lines correspond to the best fit with the values given in the text.



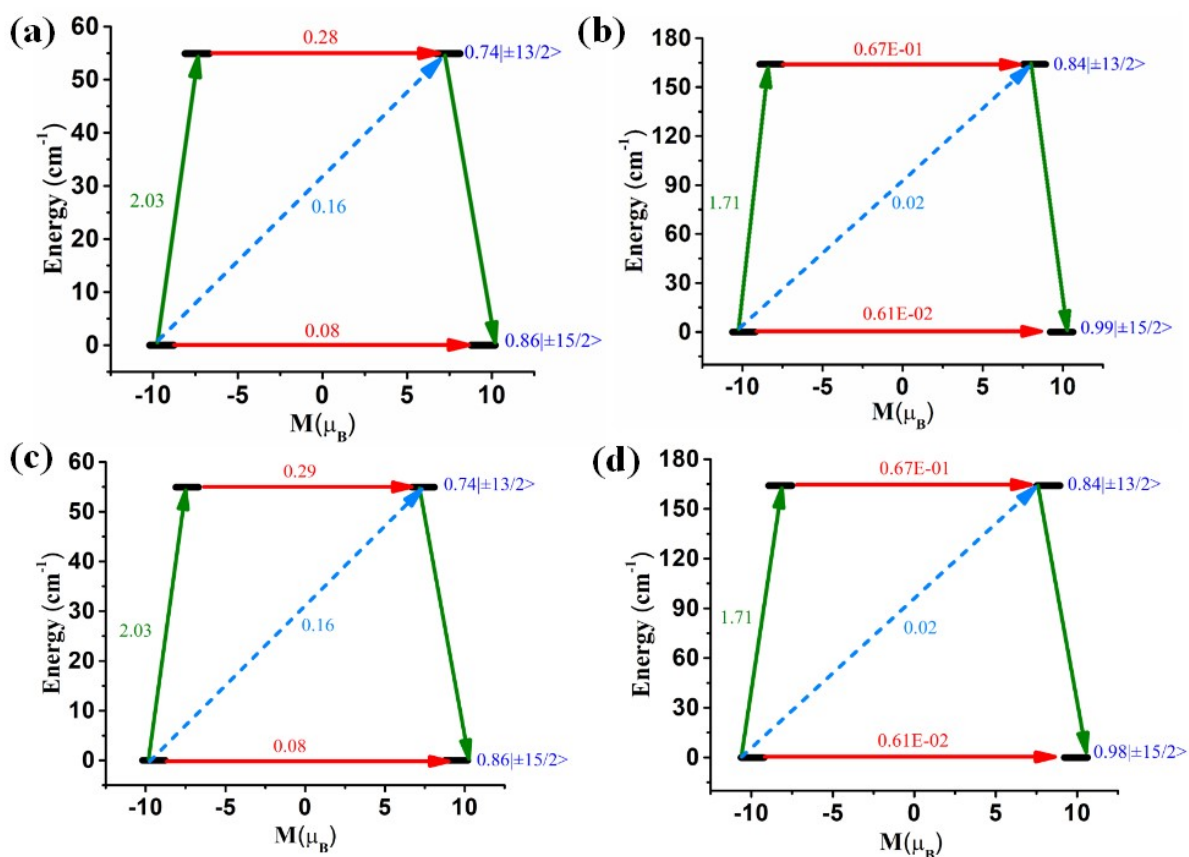

**Fig. S27.** The mechanism of magnetization relaxation of (a) Dy2A (Fig. S8; Dy<sub>b</sub>) (b) Dy1 (Fig. S8; Dy<sub>w</sub>) (c) Dy2 (Fig. S8; Dy<sub>b</sub>) (d) Dy1A (Fig. S8; Dy<sub>w</sub>) centres of complex 1. The black level corresponds to the energy of a KD as a function of magnetic moment. The red arrow represents the QTM in the ground state and TA-QTM in the excited state. The sky-blue dashed arrow denotes the Orbach relaxation process and olive arrow denotes the most probable pathway of magnetization relaxation. The blue numbers represent the  $m_J$  composition of a KD.

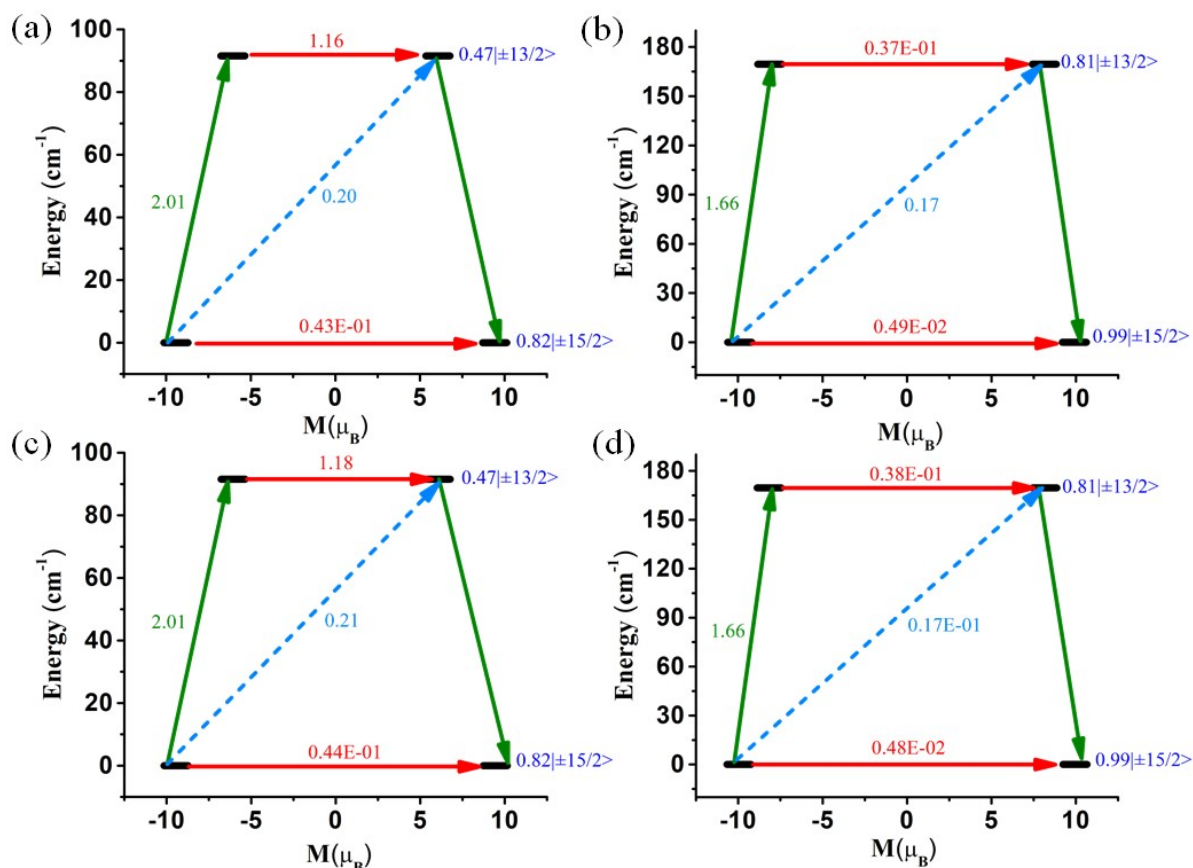

**Fig. S28.** The mechanism of magnetization relaxation of (a) Dy2 (Fig. S8; Dy<sub>b</sub>) (b) Dy1 (Fig. S8; Dy<sub>w</sub>) (c) Dy2A (Fig. S8; Dy<sub>b</sub>) (d) Dy1A (Fig. S8; Dy<sub>w</sub>) centres of complex 2. The black level corresponds to the energy of a KD as a function of magnetic moment. The red arrow represents the QTM in the ground state and TA-QTM in the excited state. The sky-blue dashed arrow denotes the Orbach relaxation process and olive arrow denotes the most probable pathway of magnetization relaxation. The blue numbers represent the  $m_j$  composition of a KD.

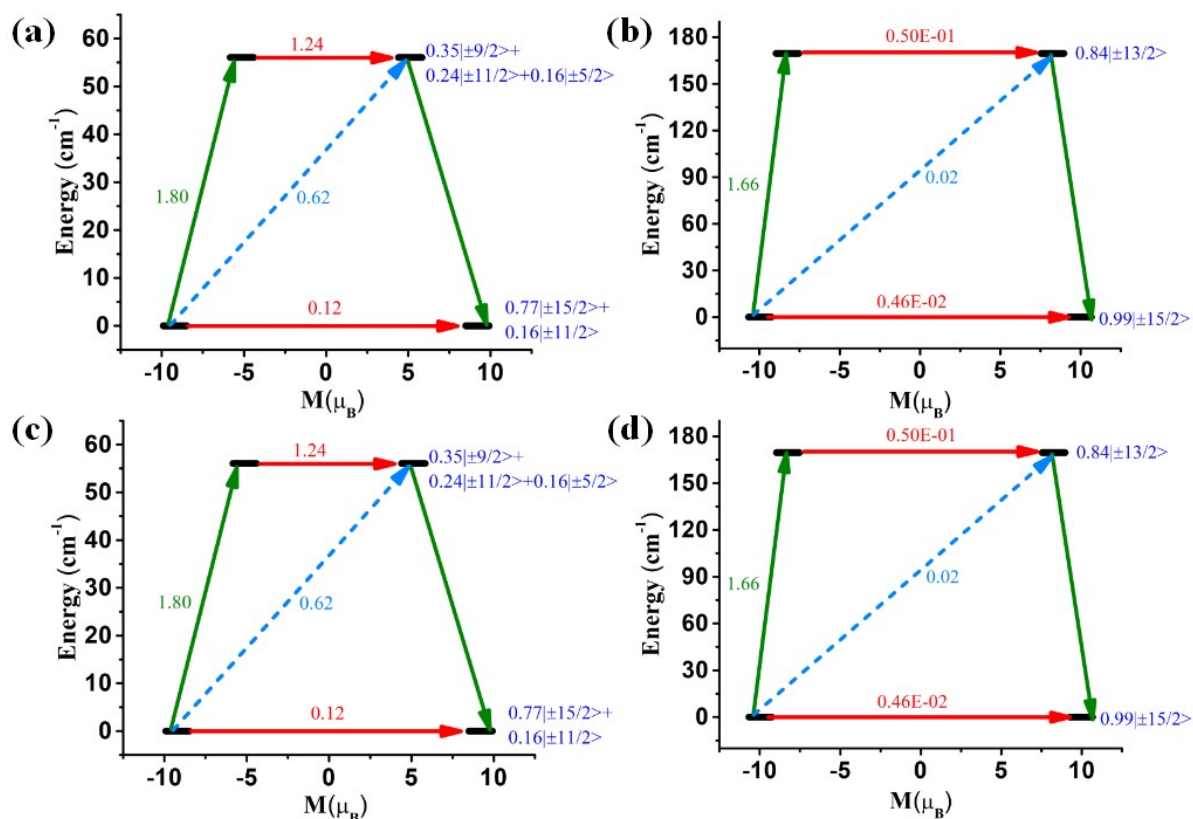

**Fig. S29.** The mechanism of magnetization relaxation of (a) Dy2A (Fig. S8;  $\text{Dy}_b$ ) (b) Dy1 (Fig. S8;  $\text{Dy}_w$ ) (c) Dy2 (Fig. S8;  $\text{Dy}_b$ ) (d) Dy1A (Fig. S8;  $\text{Dy}_w$ ) centres of complex 3. The black level corresponds to the energy of a KD as a function of magnetic moment. The red arrow represents the QTM in the ground state and TA-QTM in the excited state. The sky-blue dashed arrow denotes the Orbach relaxation process and olive arrow denotes the most probable pathway of magnetization relaxation. The blue numbers represent the  $m_j$  composition of a KD.

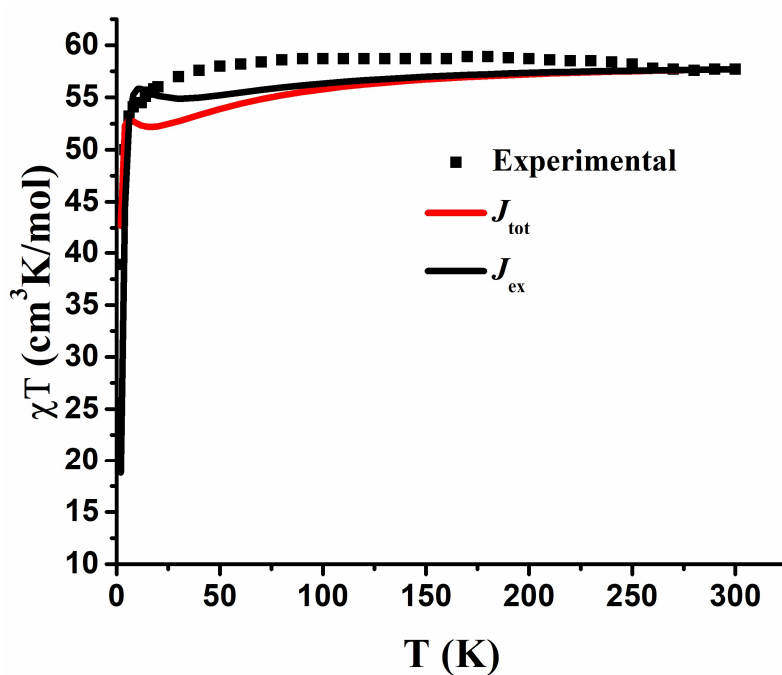

**Fig. S30.** A comparison of experimental and POLY\_ANISO simulated  $\chi T$  vs  $T$  plot of complex 2.

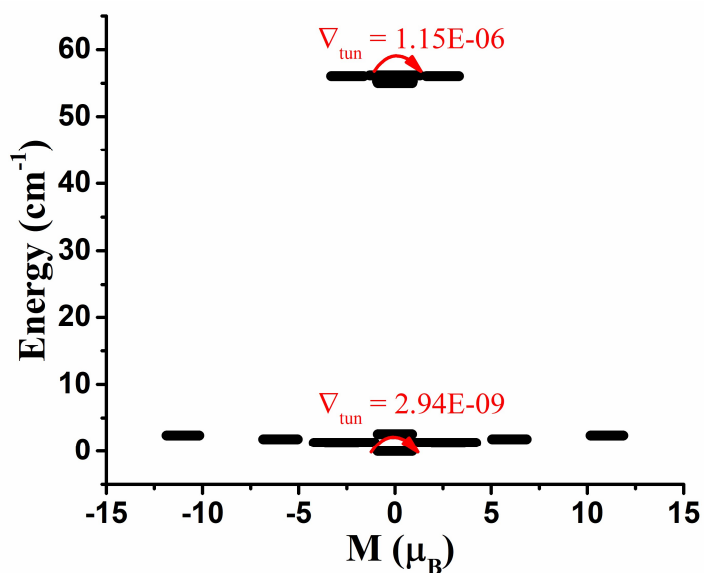

**Fig. S31.** The exchange coupled relaxation mechanism of complex 1. The black line indicated the energy of pKD as a function of magnetic moment. The tunnel splitting ( $\nabla_{\text{tun}}$ ) values are given in  $\text{cm}^{-1}$ .

**References:**

- S1. K. Zhang, V. Montigaud, O. Cador, G.-P. Li, B. L. Guennic, J.-K. Tang and Y.-Y. Wang, *Inorg. Chem.*, 2018, **57**, 8550.
- S2. K. Zhang, G.-P. Li, C. Zhang and Y.-Y. Wang, *J. Solid State Chem.*, 2019, **273**, 11.
- S3. K. Zhang, G.-P. Li, V. Montigaud, O. Cador, B. L. Guennic, J.-K. Tang and Y.-Y. Wang, *Dalton Trans.*, 2019, **48**, 2135.
- S4. K. C. Mondal, G. E. Kostakis, Y. Lan and A. K. Powell, *Polyhedron*, 2013, **66**, 268.
- S5. A. K. Jami, J. Ali, S. Mondal, J. Homs-Esquius, E. C. Sañudo and V. Baskar, *Polyhedron*, 2018, **151**, 90.
